# Supplementary material for: The genetic spectrum of a cohort of patients clinically diagnosed as Parkinson’s disease in mainland China
Source: PubMed Central journal article supplement (PMC10192372; doi:10.1038/s41531-023-00518-9), 2023-05-17
Supplement: 41531_2023_518_MOESM1_ESM.pdf [file 41531_2023_518_MOESM1_ESM.pdf]

## Supplementary Materials

The genetic spectrum of a cohort of patients clinically diagnosed as Parkinson's disease in mainland China

### Authors

Yi-Min Sun<sup>1,a</sup>, M.D., Ph.D.; Xin-Yue Zhou<sup>1,a</sup>, M.D.; Xiao-Niu Liang<sup>1,a</sup>, Ph.D.; Jin-Ran Lin<sup>2,a</sup>, B.S.; Yi-Dan Xu<sup>1</sup>, M.D.; Chen Chen<sup>1</sup>, M.D., Ph.D.; Si-Di Wei<sup>1</sup>, M.D.; Qi-Si Chen<sup>1</sup>, M.D.; Feng-Tao Liu<sup>1</sup>, M.D., Ph.D.; Jue Zhao<sup>1</sup>, M.D.; Yi-Lin Tang<sup>1</sup>, M.D., Ph.D.; Bo Shen<sup>1</sup>, M.D., Ph.D.; Lin-Hua Gan<sup>1</sup>, Ph.D.; Boxun Lu<sup>3</sup>, Ph.D.; Zheng-Tong Ding<sup>1</sup>, M.D., Ph.D.; Yu An<sup>2,\*</sup>, Ph.D.; Jian-Jun Wu<sup>1,\*</sup>, M.D., Ph.D.; Jian Wang<sup>1,\*</sup>, M.D., Ph.D..

### Authors' affiliations

1. Department of Neurology and National Research Center for Aging and Medicine & National Center for Neurological Disorders, State Key Laboratory of Medical Neurobiology, Huashan Hospital, Fudan University, Shanghai, China
2. Human Phenome Institute, Zhangjiang Fudan International Innovation Center, MOE Key Laboratory of Contemporary Anthropology, Fudan University, Shanghai, China
3. Neurology Department at Huashan Hospital, State Key Laboratory of Medical Neurobiology and MOE Frontiers Center for Brain Science, Institutes of Brain Science, School of Life Sciences, Fudan University, Shanghai, China

## Supplementary Results

### ***The mutational frequency of causative genes and the genotypes***

All seven spinocerebellar ataxia type 2 (SCA2) patients carried a mild CAG-repeat expansion (35-37) and four of them had CAA interruptions <sup>1</sup>, while the CAG-repeat numbers of five spinocerebellar ataxia type 3 (SCA3) patients were all in the fully penetrant range.

Among the 200 alleles with pathogenic/likely pathogenic (P/LP) *PRKN* variants, 123 (61.5%) had exon deletion/duplication/triplication, 74 (37%) had single nucleotide variants or small indels, and the other 3 (1.5%) carried both exon deletion/duplication and single nucleotide variants. The variants were commonly detected in exon 2-4 (47.5%).

The heterozygous *GBA* variants consisted of single nucleotide variants, small indels and splicing variants. *GBA* p.Leu483Pro variant was the most prevalent variant, accounting for 40.51% (32/79 alleles) of all the variants.

All the P/LP variants on 46 alleles of *PLA2G6* were single nucleotide variants. There is one hot single nucleotide variant of p.Asp331Tyr (c.G991T in exon 7), accounting for 17.4% (8/46 alleles) of all the variants.

We found 6 pedigrees carrying P/LP variants in *SNCA* including four with duplication and two with p.Ala53Thr, among which three pedigrees have been reported by us <sup>2,3</sup>. The length of genomic duplication in 4 pedigrees carrying *SNCA* was 139kb (f-LO-003), 5.4Mb (EO-114), 1.58Mb (f-LO-017), and 160kb (EO-205), respectively, by array-based comparative genomic hybridization (aCGH) or whole genome sequencing (**Supplementary Figure 2**).

Two P/LP variants in *LRRK2* were found in the early onset group, including p.Arg1441Cys <sup>4</sup> in a patient without family history and p.Asn1437Asp <sup>5</sup> in a

patient with autosomal dominant family history of PD.

Two hundred healthy seniors recruited from the community epidemiologic investigations were applied target sequencing of 116 genes for the confirmation of the novel P/LP variants. None of the novel variants was found.

## Figure legends

**Supplementary Figure 1. Schematic representations of pathogenic/likely pathogenic variants identified in *CHCHD2*, *DCTN1*, *DJ-1*, *GBA*, *GCH1*, *HTRA2*, *LRRK2*, *MAPT*, *PINK1*, *PLA2G6*, *PRKN*, *PSEN1*, *SNCA*, *TH* and *VPS35* in this study.**

Deletion/duplication of exons or splicing variants were labelled in the schematic diagram of exons. Variants in the coding areas were labelled in the schematic diagram of protein. Novel pathogenic/likely pathogenic variants were in red. The number on the top right of the variant indicate the times occurred in the cohort.

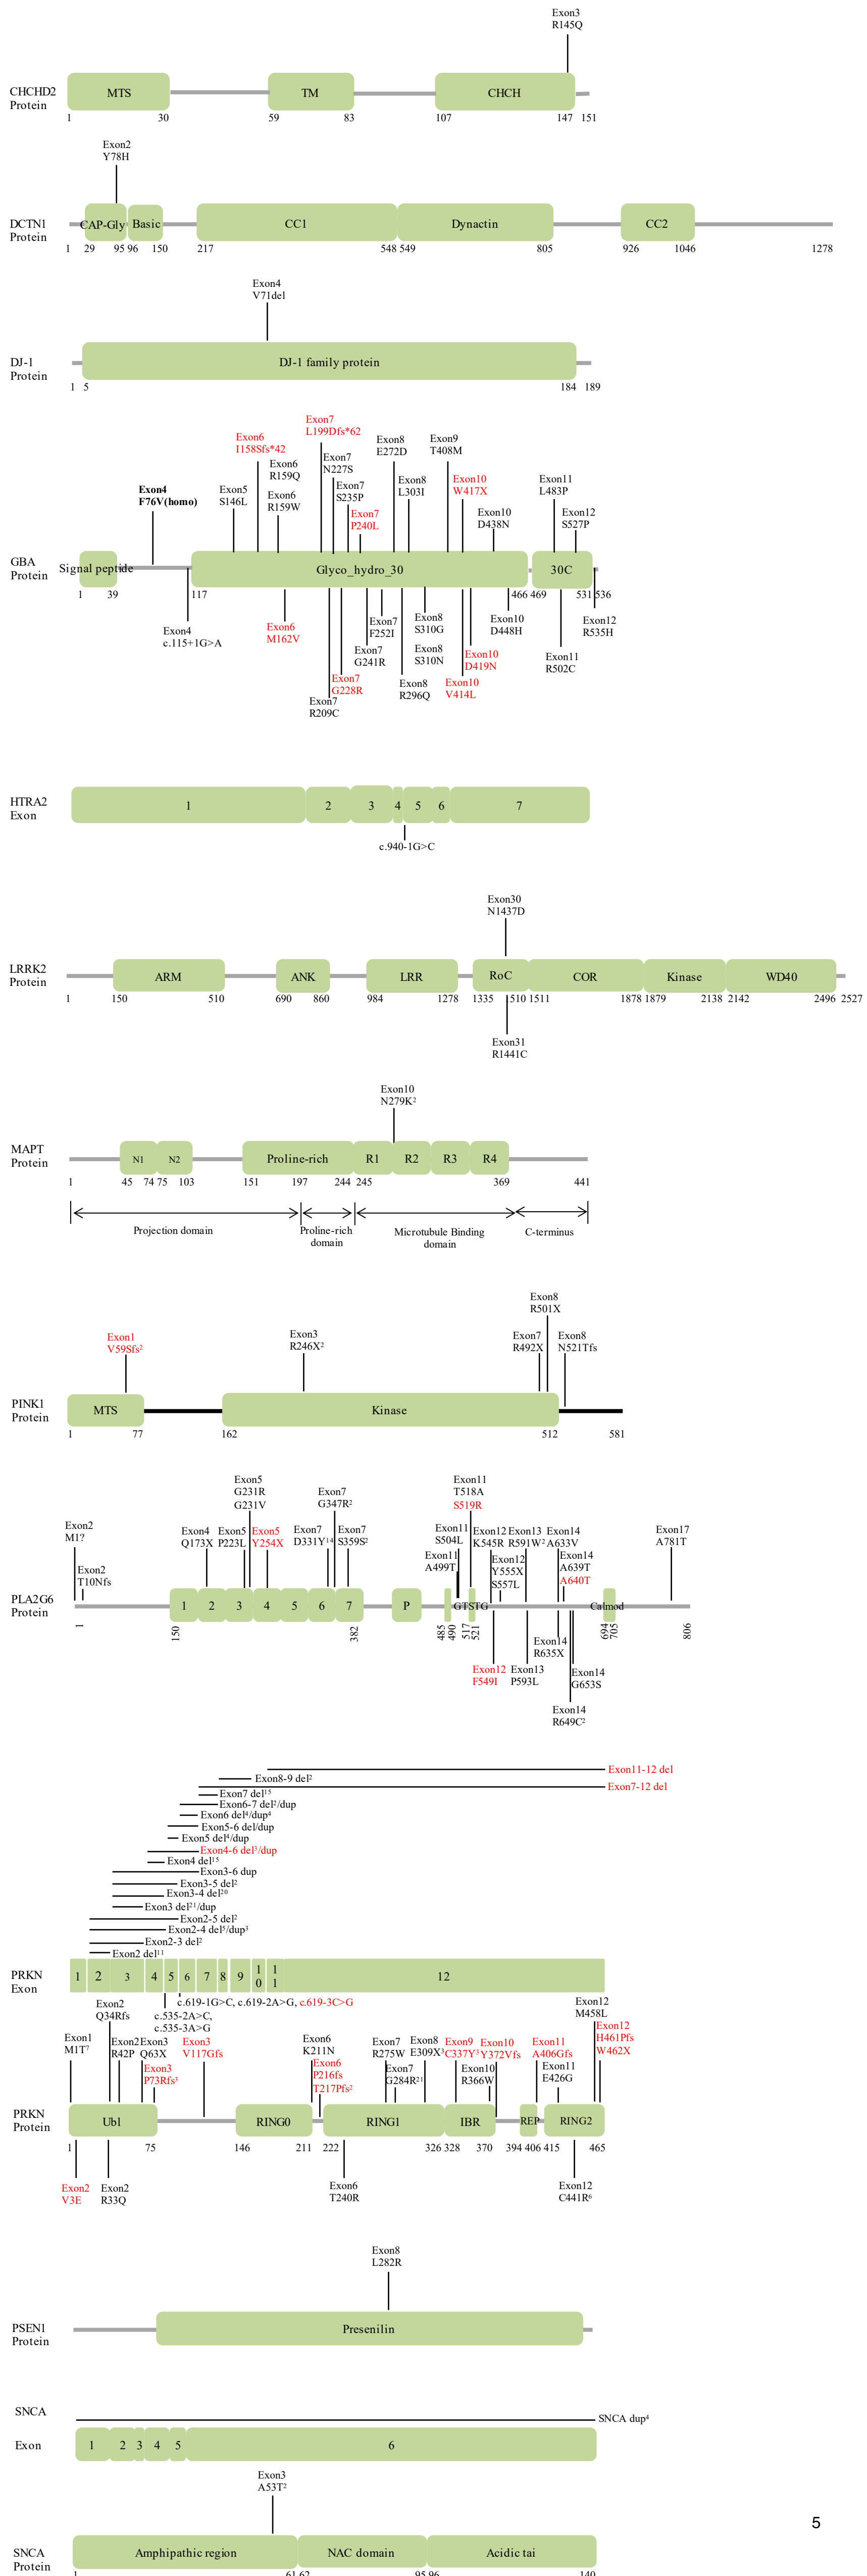

**Supplementary Figure 2. The SNCA duplication identified in the study.**

(A.C) The duplication of exon 1-6 of *SNCA* was detected in f-LO-017 and EO-205 by multiplex ligation-dependent probe amplification (red square). (B) A 1.58Mb duplication (chr4: 90023715\_91602310) (red arrow) contained 6 genes including *SNCA* detected by whole genome sequencing (f-LO-017). (D) A 160kb duplication (chr4: 90617242\_90781117) (red arrow) contained 2 genes including *SNCA* by whole genome sequencing (EO-205). The results of *SNCA* duplication in other 2 probands were referred to our previous work <sup>2</sup>.

**A.**

Z8-QX2100824801-Parkinson-Mix1-D4

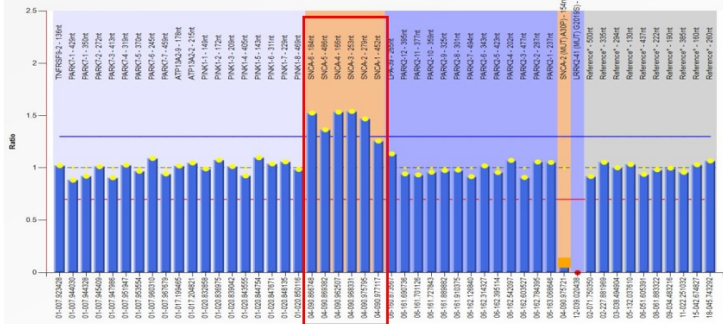**C.**

PD0533D-P051

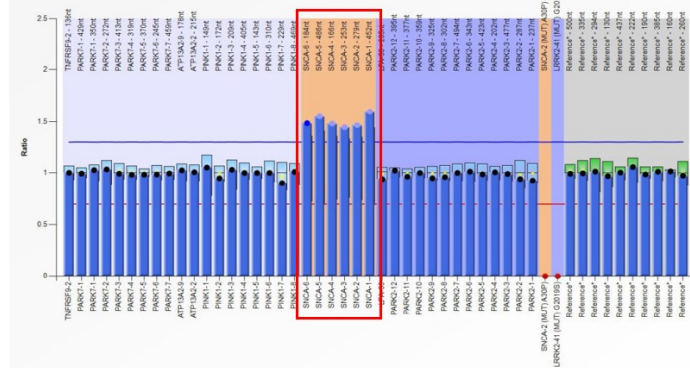**B.**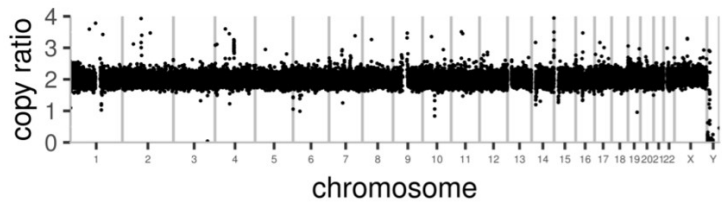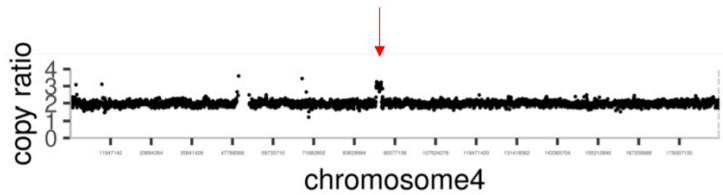**D.**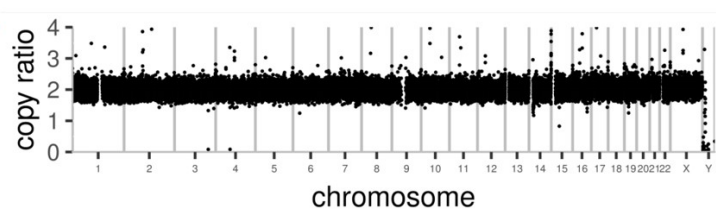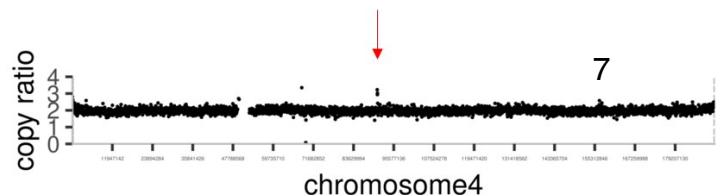

## Reference

- 1 Mencacci, N. E. *et al.* Parkinson's disease in GTP cyclohydrolase 1 mutation carriers. *Brain : a journal of neurology* **137**, 2480-2492, doi:10.1093/brain/awu179 (2014).
- 2 Du, Y. J. *et al.* Clinical variability in Chinese families with Parkinson disease and SNCA duplication, including the shortest 139kb duplication. *Parkinsonism & related disorders* **68**, 60-62, doi:10.1016/j.parkreldis.2019.09.030 (2019).
- 3 Xiong, W. X. *et al.* The heterozygous A53T mutation in the alpha-synuclein gene in a Chinese Han patient with Parkinson disease: case report and literature review. *Journal of neurology* **263**, 1984-1992, doi:10.1007/s00415-016-8213-1 (2016).
- 4 Peng, F. *et al.* The heterozygous R1441C mutation of leucine-rich repeat kinase 2 gene in a Chinese patient with Parkinson disease: A five-year follow-up and literatures review. *Journal of the neurological sciences* **373**, 23-26, doi:10.1016/j.jns.2016.12.009 (2017).
- 5 Zhao, Y. *et al.* The role of genetics in Parkinson's disease: a large cohort study in Chinese mainland population. *Brain* **143**, 2220-2234, doi:10.1093/brain/awaa167 (2020).



**Supplementary Table 1.** The demographic and clinical features of the patients initially diagnosed with PD

| Clinical features               | Total<br>(N=832) | Early-onset group<br>(N=636) | Familial late-onset group<br>(N=196) | p value         |
|---------------------------------|------------------|------------------------------|--------------------------------------|-----------------|
| Sex, female (%)                 | 352 (42.31)      | 256 (40.25)                  | 96 (48.98)                           | <b>0.0306*</b>  |
| Education, years                | 11.00 (6.00)     | 12.00 (6.00)                 | 9.00 (6.00)                          | <b>0.0001**</b> |
| AAO, years                      | 42.00 (14.00)    | 39.00 (12.00)                | 59.00 (10.00)                        | <b>0.0001**</b> |
| Age at examination, years       | 48.00 (16.50)    | 44.00 (11.00)                | 63.50 (10.00)                        | <b>0.0001**</b> |
| Disease duration, months        | 46.00 (65.00)    | 46.00 (67.00)                | 45.00 (57.00)                        | 0.1371          |
| LEDD, mg                        | 400.00 (350.00)  | 410.00 (400.00)              | 400.0 (300.00)                       | 0.8322          |
| Motor                           |                  |                              |                                      |                 |
| UPDRS-part III, score (Med off) | 29.00 (20.00)    | 28.00 (20.00)                | 29.00 (18.00)                        | 0.7439          |
| Non-motor manifestations        |                  |                              |                                      |                 |
| BDI, score                      | 12.00 (13.00)    | 12.00 (12.00)                | 13.00 (13.00)                        | 0.7732          |
| PDQ39, score                    | 30.00 (36.00)    | 30.00 (37.00)                | 31.00 (35.00)                        | 0.7106          |
| NMSQ, score                     | 10.00 (10.00)    | 10.00 (10.00)                | 12.00 (9.00)                         | <b>0.0406*</b>  |
| ESS, score                      | 6.00 (6.00)      | 5.00 (5.00)                  | 7.00 (8.00)                          | <b>0.0129*</b>  |
| RBDSQ, score                    | 3.00 (3.00)      | 3.00 (3.00)                  | 4.00 (5.00)                          | <b>0.0015**</b> |
| SSST-12, score                  | 6.00 (4.00)      | 7.00 (3.00)                  | 5.00 (3.00)                          | <b>0.0001**</b> |
| Cognitive characteristics       |                  |                              |                                      |                 |
| Memory                          | 0.06 (1.25)      | 0.20 (1.15)                  | -0.62 (1.21)                         | <b>0.0001**</b> |
| Executive function              | 0.14 (0.82)      | 0.16 (0.75)                  | -0.12 (0.89)                         | <b>0.0002**</b> |
| Language                        | 0.05 (1.27)      | 0.13 (1.23)                  | -0.34 (1.25)                         | <b>0.0001**</b> |
| Visuospatial function           | 0.17 (1.08)      | 0.23 (0.88)                  | -0.02 (1.21)                         | <b>0.0001**</b> |
| Attention and working memory    | 0.15 (1.10)      | 0.26 (1.00)                  | -0.18 (1.29)                         | <b>0.0001**</b> |

| Clinical features                   | Total<br>(N=832) | Early-onset group<br>(N=636) | Familial late-onset group<br>(N=196) | p value         |
|-------------------------------------|------------------|------------------------------|--------------------------------------|-----------------|
| Raw neuropsychological tests scores |                  |                              |                                      |                 |
| MMSE, score                         | 28.00 (1.00)     | 28.00 (1.00)                 | 27.00 (5.00)                         | <b>0.0001**</b> |
| Memory                              |                  |                              |                                      |                 |
| AVLT-delay recall, score            | 5.00 (4.00)      | 5.00 (3.00)                  | 3.00 (4.00)                          | <b>0.0001**</b> |
| AVLT-T, score                       | 25.00 (14.50)    | 28.00 (14.00)                | 19.50 (12.00)                        | <b>0.0001**</b> |
| CFT-delay recall, score             | 15.00 (11.00)    | 16.00 (10.00)                | 11.00 (11.50)                        | <b>0.0001**</b> |
| Executive function                  |                  |                              |                                      |                 |
| CWT, second                         | 73.00 (31.00)    | 71.00 (31.00)                | 79.00 (32.00)                        | <b>0.0014**</b> |
| CWT right, score                    | 47.00 (5.00)     | 48.00 (4.00)                 | 45.00 (6.00)                         | <b>0.0001**</b> |
| TMT-B, second                       | 126.00 (73.00)   | 120.00 (63.00)               | 157.50 (86.50)                       | <b>0.0001**</b> |
| Language                            |                  |                              |                                      |                 |
| BNT, score                          | 24.00 (6.00)     | 24.00 (6.00)                 | 22.00 (7.00)                         | <b>0.0001**</b> |
| AFT, score                          | 16.00 (7.00)     | 17.00 (7.00)                 | 14.00 (6.00)                         | <b>0.0001**</b> |
| Visuospatial function               |                  |                              |                                      |                 |
| CFT, score                          | 33.00 (5.00)     | 34.00 (3.00)                 | 31.00 (11.00)                        | <b>0.0001**</b> |
| CDT, score                          | 20.00 (9.00)     | 20.00 (9.00)                 | 21.00 (9.00)                         | 0.2808          |
| Attention and working memory        |                  |                              |                                      |                 |
| SDMT, score                         | 39.00 (11.00)    | 42.00 (19.00)                | 31.00 (20.00)                        | <b>0.0001**</b> |
| TMT-A, second                       | 53.50 (28.00)    | 52.00 (24.00)                | 67.00 (48.50)                        | <b>0.0001**</b> |

Abbreviations: AAO: age at onset; AFT: Animal Fluency Test; AVLT: Auditory Verbal Learning Test; AVLT-T: Auditory Verbal Learning Test total score; BDI: Beck Depression Inventory; BNT: Boston Naming Test; CDT: Clock Drawing Test; CFT: Rey-Osterrieth Complex Figure Test; CWT: Stroop Color-Word Test; ESS:

Epworth Sleepiness Score; LEDD: Levodopa equivalent dose daily; MMSE: Mini Mental State Examination; NMSQ: Non-Motor Symptoms Questionnaire; PDQ39: 39-item Parkinson's disease questionnaire; RBDSQ: Rapid-Eye-Movement Sleep Behavior Disorder Screening Questionnaire; SDMT: Symbol Digit Modalities Test; SSST-12: Sniffin' Sticks screening 12 test; TMT: Trail Making Test; UPDRS: Unified Parkinson's Disease Rating Scale.

The continuous data are presented as median (interquartile range, IQR), and the categorical data are presented as n (%).

Note: P Value: Comparison between the early-onset group and familial late-onset group.

\*\*  $p < 0.01$ , \* $p < 0.05$

**Supplementary Table 2.** Pathogenic/likely pathogenic variants detected in the study

| Sample ID | Genetic testing | AAO | Sex | Het /Homo       | Inheritance | Chr       | Position  | Gene          | Nucleotide change | Amino acid change | Novel | ACMG                   | gnomA D_EAS | 1000g _EAS | ExAC_ EAS |
|-----------|-----------------|-----|-----|-----------------|-------------|-----------|-----------|---------------|-------------------|-------------------|-------|------------------------|-------------|------------|-----------|
| EO-001    | T+M             | 28  | F   | Homo            | AR          | chr2<br>2 | 38528924  | <i>PLA2G6</i> | c.G991T           | p.Asp331<br>Tyr   | -     | -                      | -           | -          | 0         |
| EO-002    | T+M             | 20  | M   | Het             | AR          | chr6      | 162206825 | <i>PRKN</i>   | c.G850C           | p.Gly284<br>Arg   | -     | -                      | -           | -          | -         |
| EO-002    | T+M             | 20  | M   | Het             | AR          | chr6      | 161771144 | <i>PRKN</i>   | c.G1385A          | p.Trp462<br>Ter   | novel | PVS1+PM2+<br>PM3=P     | -           | -          | -         |
| EO-003    | T+M             | 23  | F   | Het             | AR          | chr6      | 6q26      | <i>PRKN</i>   | exon 7 del        | -                 | -     | -                      | -           | -          | -         |
| EO-003    | T+M             | 23  | F   | Het, de<br>novo | AR          | chr6      | 161969959 | <i>PRKN</i>   | c.G1010A          | p.Cys337<br>Tyr   | novel | PM2+PM3+P<br>M6+PP3=LP | -           | -          | -         |
| EO-004    | T+M             | 32  | M   | Het             | AR          | chr6      | 6q26      | <i>PRKN</i>   | exon 3-5<br>del   | -                 | -     | -                      | -           | -          | -         |
| EO-004    | T+M             | 32  | M   | Het             | AR          | chr6      | 162206825 | <i>PRKN</i>   | c.G850C           | p.Gly284<br>Arg   | -     | -                      | -           | -          | -         |
| EO-005    | T+M             | 5   | M   | Homo            | AR          | chr6      | 6q26      | <i>PRKN</i>   | exon 7 del        | -                 | -     | -                      | -           | -          | -         |
| EO-006    | T+M+S           | 34  | M   | Het             | AR          | chr6      | 162394349 | <i>PRKN</i>   | c.C719G           | p.Thr240<br>Arg   | -     | -                      | -           | -          | -         |
| EO-006    | T+M+S           | 34  | M   | Het             | AR          | chr6      | 6q26      | <i>PRKN</i>   | exon 3-4<br>del   | -                 | -     | -                      | -           | -          | -         |
| EO-007    | T+M             | 28  | M   | Het             | AR          | chr6      | 6q26      | <i>PRKN</i>   | exon 8-9<br>del   | -                 | -     | -                      | -           | -          | -         |
| EO-007    | T+M             | 28  | M   | Het             | AR          | chr6      | 6q26      | <i>PRKN</i>   | exon 3 del        | -                 | -     | -                      | -           | -          | -         |

| Sample ID | Genetic testing | AAO | Sex | Het /Homo | Inheritance | Chr  | Position  | Gene        | Nucleotide change  | Amino acid change | Novel | ACMG               | gnomA D_EAS | 1000g _EAS | ExAC_ EAS |
|-----------|-----------------|-----|-----|-----------|-------------|------|-----------|-------------|--------------------|-------------------|-------|--------------------|-------------|------------|-----------|
| EO-008    | T+M+S           | 11  | M   | Homo      | AR          | chr6 | 6q26      | <i>PRKN</i> | exon 3 del         | -                 | -     | -                  | -           | -          | -         |
| EO-009    | T+M             | 12  | M   | Homo      | AR          | chr6 | 6q26      | <i>PRKN</i> | exon 3 del         | -                 | -     | -                  | -           | -          | -         |
| EO-010    | T+M             | 30  | F   | Het       | AR          | chr6 | 6q26      | <i>PRKN</i> | exon 4 del         | -                 | -     | -                  | -           | -          | -         |
| EO-010    | T+M             | 30  | F   | Het       | AR          | chr6 | 6q26      | <i>PRKN</i> | exon 3 dup         | -                 | -     | -                  | -           | -          | -         |
| EO-011    | T+M             | 21  | M   | Homo      | AR          | chr6 | 162864388 | <i>PRKN</i> | c.G125C            | p.Arg42Pro        | -     | -                  | -           | -          | -         |
| EO-012    | T+M+S           | 41  | M   | Het       | AR          | chr6 | 161990395 | <i>PRKN</i> | c.G925T            | p.Glu309Ter       | novel | PVS1+PM2+<br>PM3=P | -           | -          | -         |
| EO-012    | T+M+S           | 41  | M   | Het       | AR          | chr6 | 162206825 | <i>PRKN</i> | c.G850C            | p.Gly284Arg       | -     | -                  | -           | -          | -         |
| EO-013    | T+M+S           | 27  | M   | Het       | AR          | chr6 | 161990395 | <i>PRKN</i> | c.G925T            | p.Glu309Ter       | novel | PVS1+PM2+<br>PM3=P | -           | -          | -         |
| EO-013    | T+M+S           | 27  | M   | Het       | AR          | chr6 | 162206825 | <i>PRKN</i> | c.G850C            | p.Gly284Arg       | -     | -                  | -           | -          | -         |
| EO-014    | T+M             | 37  | M   | Homo      | AR          | chr6 | 6q26      | <i>PRKN</i> | exon 4 del         | -                 | -     | -                  | -           | -          | -         |
| EO-015    | T+M             | 23  | M   | Het       | AR          | chr6 | 6q26      | <i>PRKN</i> | exon 3 del         | -                 | -     | -                  | -           | -          | -         |
| EO-015    | T+M             | 23  | M   | Het       | AR          | chr6 | 162394452 | <i>PRKN</i> | c.619-3C>G         | -                 | -     | -                  | -           | -          | -         |
| EO-016    | T+M             | 25  | M   | Het       | AR          | chr6 | 6q26      | <i>PRKN</i> | exon 7 del         | -                 | -     | -                  | -           | -          | -         |
| EO-016    | T+M             | 25  | M   | Het       | AR          | chr6 | 162864415 | <i>PRKN</i> | c.G98A & exon3 del | p.Arg33Gln & -    | -     | -                  | -           | -          | -         |

| Sample ID | Genetic testing | AAO | Sex | Het /Homo | Inheritance | Chr       | Position  | Gene          | Nucleotide change | Amino acid change | Novel | ACMG                   | gnomA D_EAS | 1000g _EAS | ExAC_ EAS |
|-----------|-----------------|-----|-----|-----------|-------------|-----------|-----------|---------------|-------------------|-------------------|-------|------------------------|-------------|------------|-----------|
| EO-017    | T+M             | 17  | F   | Homo      | AR          | chr6      | 162206825 | <i>PRKN</i>   | c.G850C           | p.Gly284 Arg      | -     | -                      | -           | -          | -         |
| EO-018    | T+M             | 22  | M   | Het       | AR          | chr6      | 6q26      | <i>PRKN</i>   | exon 2 del        | -                 | -     | -                      | -           | -          | -         |
| EO-018    | T+M             | 22  | M   | Het       | AR          | chr6      | 162206825 | <i>PRKN</i>   | c.G850C           | p.Gly284 Arg      | -     | -                      | -           | -          | -         |
| EO-019    | T+M             | 6   | M   | Homo      | AR          | chr1      | 8029417   |               | c.205_207del      | p.Val71del        | novel | PM1+PM2+P<br>M4+PP4=LP | -           | -          | -         |
| EO-020    | T+M             | 33  | M   | Homo      | AR          | chr6      | 6q26      | <i>PRKN</i>   | exon 4 del        | -                 | -     | -                      | -           | -          | -         |
| EO-021    | T+M             | 23  | F   | Het       | AR          | chr2<br>2 | 38528924  | <i>PLA2G6</i> | c.G991T           | p.Asp331 Tyr      | -     | -                      | -           | -          | 0         |
| EO-021    | T+M             | 23  | F   | Het       | AR          | chr2<br>2 | 38115604  | <i>PLA2G6</i> | c.G1957A          | p.Gly653 Ser      | -     | -                      | -           | -          | -         |
| EO-022    | T+M             | 26  | M   | Het       | AR          | chr2<br>2 | 38511665  | <i>PLA2G6</i> | c.C1903T          | p.Arg635 Ter      | -     | -                      | -           | -          | -         |
| EO-022    | T+M             | 26  | M   | Het       | AR          | chr2<br>2 | 38528924  | <i>PLA2G6</i> | c.G991T           | p.Asp331 Tyr      | -     | -                      | -           | -          | 0         |
| EO-023    | T+M             | 32  | M   | Homo      | AR          | chr6      | 162206825 | <i>PRKN</i>   | c.G850C           | p.Gly284 Arg      | -     | -                      | -           | -          | -         |
| EO-024    | T+M             | 33  | F   | Het       | AR          | chr6      | 6q26      | <i>PRKN</i>   | exon 2 del        | -                 | -     | -                      | -           | -          | -         |
| EO-024    | T+M             | 33  | F   | Het       | AR          | chr6      | 6q26      | <i>PRKN</i>   | exon 4 del        | -                 | -     | -                      | -           | -          | -         |
| EO-025    | T+M             | 29  | M   | Homo      | AR          | chr6      | 6q26      | <i>PRKN</i>   | exon 3-4 del      | -                 | -     | -                      | -           | -          | -         |

| Sample ID | Genetic testing | AAO | Sex | Het /Homo | Inheritance | Chr       | Position  | Gene          | Nucleotide change | Amino acid change | Novel | ACMG                   | gnomA D_EAS | 1000g _EAS | ExAC_ EAS |
|-----------|-----------------|-----|-----|-----------|-------------|-----------|-----------|---------------|-------------------|-------------------|-------|------------------------|-------------|------------|-----------|
| EO-026    | T+M             | 31  | F   | Het       | AR          | chr6      | 6q26      | <i>PRKN</i>   | exon 3 del        | -                 | -     | -                      | -           | -          | -         |
| EO-026    | T+M             | 31  | F   | Het       | AR          | chr6      | 6q26      | <i>PRKN</i>   | exon 3-4 del      | -                 | -     | -                      | -           | -          | -         |
| EO-027    | T+M             | 24  | M   | Het       | AR          | chr6      | 6q26      | <i>PRKN</i>   | exon 4-6 del      | -                 | -     | -                      | -           | -          | -         |
| EO-027    | T+M             | 24  | M   | Het       | AR          | chr6      | 162206825 | <i>PRKN</i>   | c.G850C           | p.Gly284 Arg      | -     | -                      | -           | -          | -         |
| EO-028    | T+M+S           | 26  | M   | Het       | AR          | chr2<br>2 | 38516863  | <i>PLA2G6</i> | c.T1645A          | p.Phe549Ile       | novel | PM2+PM3+P<br>P1+PP4=LP | -           | -          | -         |
| EO-028    | T+M+S           | 26  | M   | Het       | AR          | chr2<br>2 | 38519182  | <i>PLA2G6</i> | c.C1511T          | p.Ser504 Leu      | -     | -                      | -           | -          | -         |
| EO-029    | T+M+S           | 24  | F   | Het       | AR          | chr6      | 161771208 | <i>PRKN</i>   | c.T1321C          | p.Cys441 Arg      | -     | -                      | -           | -          | -         |
| EO-029    | T+M+S           | 24  | F   | Het       | AR          | chr6      | 6q26      | <i>PRKN</i>   | exon 3 del        | -                 | -     | -                      | -           | -          | -         |
| EO-030    | T+M+S           | 27  | F   | Het       | AR          | chr6      | 161771208 | <i>PRKN</i>   | c.T1321C          | p.Cys441 Arg      | -     | -                      | -           | -          | -         |
| EO-030    | T+M+S           | 27  | F   | Het       | AR          | chr6      | 6q26      | <i>PRKN</i>   | exon 3 del        | -                 | -     | -                      | -           | -          | -         |
| EO-031    | T+M+S           | 32  | F   | Homo      | AR          | chr6      | 162206825 | <i>PRKN</i>   | c.G850C           | p.Gly284 Arg      | -     | -                      | -           | -          | -         |
| EO-032    | T+M             | 23  | M   | Homo      | AR          | chr6      | 6q26      | <i>PRKN</i>   | exon 7 del        | -                 | -     | -                      | -           | -          | -         |
| EO-033    | T+M+S           | NA  | M   | Homo      | AR          | chr6      | 6q26      | <i>PRKN</i>   | exon 7 del        | -                 | -     | -                      | -           | -          | -         |

| Sample ID | Genetic testing | AAO | Sex | Het /Homo | Inheritance | Chr       | Position  | Gene          | Nucleotide change | Amino acid change | Novel | ACMG                   | gnomA D_EAS | 1000g _EAS | ExAC_ EAS |
|-----------|-----------------|-----|-----|-----------|-------------|-----------|-----------|---------------|-------------------|-------------------|-------|------------------------|-------------|------------|-----------|
| EO-034    | T+M             | 32  | F   | Het       | AR          | chr2<br>2 | 38536095  | <i>PLA2G6</i> | c.G691C           | p.Gly231<br>Arg   | -     | -                      | -           | -          | -         |
| EO-034    | T+M             | 32  | F   | Het       | AR          | chr2<br>2 | 38511670  | <i>PLA2G6</i> | c.C1898T          | p.Ala633<br>Val   | novel | PM1+PM2+P<br>M3+PP4=LP | -           | -          | -         |
| EO-035    | T+M+S           | 28  | F   | Het       | AR          | chr6      | 6q26      | <i>PRKN</i>   | exon 3 del        | -                 | -     | -                      | -           | -          | -         |
| EO-035    | T+M+S           | 28  | F   | Het       | AR          | chr6      | 161771147 | <i>PRKN</i>   | c.1381dup<br>C    | p.His461<br>Profs | -     | PVS1+PM2+<br>PM3=P     | -           | -          | -         |
| EO-036    | T+M             | 24  | F   | Het       | AR          | chr6      | 6q26      | <i>PRKN</i>   | exon 2-5<br>del   | -                 | -     | -                      | -           | -          | -         |
| EO-036    | T+M             | 24  | F   | Het       | AR          | chr6      | 6q26      | <i>PRKN</i>   | exon 2 del        | -                 | -     | -                      | -           | -          | -         |
| EO-037    | T+M             | 19  | F   | Het       | AR          | chr6      | 6q26      | <i>PRKN</i>   | exon 7 del        | -                 | -     | -                      | -           | -          | -         |
| EO-037    | T+M             | 19  | F   | Het       | AR          | chr6      | 163148699 | <i>PRKN</i>   | c.T2C             | p.Met1?           | -     | -                      | -           | -          | -         |
| EO-038    | T+M             | 30  | F   | Het       | AR          | chr6      | 6q26      | <i>PRKN</i>   | exon 3 del        | -                 | -     | -                      | -           | -          | -         |
| EO-038    | T+M             | 30  | F   | Het       | AR          | chr6      | 162864505 | <i>PRKN</i>   | c.T8A             | p.Val3Glu         | -     | -                      | -           | -          | -         |
| EO-039    | T+M             | 24  | M   | Homo      | AR          | chr6      | 161990395 | <i>PRKN</i>   | c.G925T           | p.Glu309<br>Ter   | novel | PVS1+PM2=<br>LP        | -           | -          | -         |
| EO-040    | T+M             | 46  | M   | Het       | AD          | chr1<br>4 | 55369070  | <i>GCH1</i>   | c.C312A           | p.Phe104<br>Leu   | -     | -                      | -           | -          | -         |
| EO-041    | T+M             | 15  | M   | Het       | AR          | chr6      | 6q26      | <i>PRKN</i>   | exon 2-4<br>del   | -                 | -     | -                      | -           | -          | -         |
| EO-041    | T+M             | 15  | M   | Het       | AR          | chr6      | 6q26      | <i>PRKN</i>   | exon 4 del        | -                 | -     | -                      | -           | -          | -         |
| EO-042    | T+M+S           | 37  | M   | Het       | AR          | chr6      | 6q26      | <i>PRKN</i>   | exon 6 del        | -                 | -     | -                      | -           | -          | -         |



| Sample ID | Genetic testing | AAO | Sex | Het /Homo    | Inheritance | Chr  | Position  | Gene        | Nucleotide change | Amino acid change | Novel | ACMG              | gnomA D_EAS | 1000g _EAS | ExAC_ EAS |
|-----------|-----------------|-----|-----|--------------|-------------|------|-----------|-------------|-------------------|-------------------|-------|-------------------|-------------|------------|-----------|
| EO-042    | T+M+S           | 37  | M   | Het          | AR          | chr6 | 6q26      | <i>PRKN</i> | exon 7 del        | -                 | -     | -                 | -           | -          | -         |
| EO-043    | T+M             | 33  | F   | Het          | AR          | chr6 | 6q26      | <i>PRKN</i> | exon 4 del        | -                 | -     | -                 | -           | -          | -         |
| EO-043    | T+M             | 33  | F   | Het          | AR          | chr6 | 162683782 | <i>PRKN</i> | c.C187T           | p.Gln63Ter        | novel | PVS1+PM2=LP       | -           | -          | -         |
| EO-044    | T+M             | 40  | F   | Het          | AR          | chr6 | 6q26      | <i>PRKN</i> | exon 3-4 del      | -                 | -     | -                 | -           | -          | -         |
| EO-044    | T+M             | 40  | F   | Het          | AR          | chr6 | 6q26      | <i>PRKN</i> | exon 6-7          | -                 | -     | -                 | -           | -          | -         |
| EO-045    | T+M             | 26  | M   | Het, de novo | AR          | chr6 | 6q26      | <i>PRKN</i> | exon 5 del        | -                 | -     | -                 | -           | -          | -         |
| EO-045    | T+M             | 26  | M   | Het          | AR          | chr6 | 6q26      | <i>PRKN</i> | exon 6 del        | -                 | -     | -                 | -           | -          | -         |
| EO-046    | T+M             | 12  | M   | Het          | AR          | chr6 | 162475209 | <i>PRKN</i> | c.535-3A>G        | -                 | novel | PM2+PM3+P3+PP4=LP | -           | -          | -         |
| EO-046    | T+M             | 12  | M   | Het          | AR          | chr6 | 6q26      | <i>PRKN</i> | exon 7 del        | -                 | -     | -                 | -           | -          | -         |
| EO-047    | T+M             | 21  | M   | Het          | AR          | chr6 | 6q26      | <i>PRKN</i> | exon 3-5 del      | -                 | -     | -                 | -           | -          | -         |
| EO-047    | T+M             | 21  | M   | Het          | AR          | chr6 | 6q26      | <i>PRKN</i> | exon 3-4 del      | -                 | -     | -                 | -           | -          | -         |
| EO-048    | T+M             | 29  | F   | Het          | AR          | chr6 | 6q26      | <i>PRKN</i> | exon 2-4 del      | -                 | -     | -                 | -           | -          | -         |
| EO-048    | T+M             | 29  | F   | Het          | AR          | chr6 | 6q26      | <i>PRKN</i> | exon 5-6 dup      | -                 | -     | -                 | -           | -          | -         |

| Sample ID | Genetic testing | AAO | Sex | Het /Homo | Inheritance | Chr       | Position  | Gene        | Nucleotide change     | Amino acid change | Novel | ACMG               | gnomA D_EAS | 1000g _EAS | ExAC_ EAS |
|-----------|-----------------|-----|-----|-----------|-------------|-----------|-----------|-------------|-----------------------|-------------------|-------|--------------------|-------------|------------|-----------|
| EO-049    | T+M+S           | 26  | M   | Het       | AR          | chr6      | 162683751 | <i>PRKN</i> | c.218delC             | p.Pro73Argfs*8    | novel | PVS1+PM2+PM3+PP2=P | -           | -          | -         |
| EO-049    | T+M+S           | 26  | M   | Het       | AR          | chr6      | 6q26      | <i>PRKN</i> | exon 2-4 dup          | -                 | -     | -                  | -           | -          | -         |
| EO-050    | T+M+S           | 29  | M   | Het       | AR          | chr6      | 162683751 | <i>PRKN</i> | c.218delC             | p.Pro73Argfs*8    | novel | PVS1+PM2+PM3+PP2=P | -           | -          | -         |
| EO-050    | T+M+S           | 29  | M   | Het       | AR          | chr6      | 6q26      | <i>PRKN</i> | exon 2-4 dup          | -                 | -     | -                  | -           | -          | -         |
| EO-051    | T+M             | 14  | M   | Het       | AR          | chr6      | 6q26      | <i>PRKN</i> | exon 2-4 del          | -                 | -     | -                  | -           | -          | -         |
| EO-051    | T+M             | 14  | M   | Het       | AR          | chr6      | 6q26      | <i>PRKN</i> | exon 6 del            | -                 | -     | -                  | -           | -          | -         |
| EO-052    | T+M             | 14  | F   | Het       | AR          | chr6      | 6q26      | <i>PRKN</i> | exon 3-4 del          | -                 | -     | -                  | -           | -          | -         |
| EO-052    | T+M             | 14  | F   | Het       | AR          | chr6      | 161771208 | <i>PRKN</i> | c.T1321C              | p.Cys441Arg       | -     | -                  | -           | -          | -         |
| EO-053    | T+M             | 22  | F   | Homo      | AR          | chr6      | 6q26      | <i>PRKN</i> | exon 6 dup            | -                 | -     | -                  | -           | -          | -         |
| EO-054    | T+M+S           | 19  | F   | Het       | AR          | chr6      | 6q26      | <i>PRKN</i> | exon 2 del+exon 5 dup | -                 | -     | -                  | -           | -          | -         |
| EO-054    | T+M+S           | 19  | F   | Het       | AR          | chr6      | 6q26      | <i>PRKN</i> | exon 3 del            | -                 | -     | -                  | -           | -          | -         |
| EO-055    | T+M             | 49  | F   | Het       | AD          | chr1<br>4 | 55369143  | <i>GCH1</i> | c.G239A               | p.Ser80Asn        | -     | -                  | -           | -          | -         |

| Sample ID | Genetic testing | AAO | Sex | Het /Homo    | Inheritance | Chr  | Position  | Gene         | Nucleotide change | Amino acid change | Novel | ACMG        | gnomA D_EAS | 1000g _EAS | ExAC_ EAS |
|-----------|-----------------|-----|-----|--------------|-------------|------|-----------|--------------|-------------------|-------------------|-------|-------------|-------------|------------|-----------|
| EO-056    | T+M             | 32  | F   | Het          | AR          | chr6 | 6q26      | <i>PRKN</i>  | exon 3-4 del      | -                 | -     | -           | -           | -          | -         |
| EO-056    | T+M             | 32  | F   | Het          | AR          | chr6 | 163148699 | <i>PRKN</i>  | c.T2C             | p.Met1?           | -     | -           | -           | -          | -         |
| EO-057    | T+M+S           | 33  | M   | Het          | AR          | chr6 | 6q26      | <i>PRKN</i>  | exon 3-4 del      | -                 | -     | -           | -           | -          | -         |
| EO-057    | T+M+S           | 33  | M   | Het          | AR          | chr6 | 6q26      | <i>PRKN</i>  | exon 3 del        | -                 | -     | -           | -           | -          | -         |
| EO-058    | T+M             | 32  | F   | Homo         | AR          | chr1 | 155209758 | <i>GBA</i>   | c.T226G           | p.Phe76Val        | -     | -           | -           | -          | -         |
| EO-059    | T+M+S           | 46  | M   | Het          | AR          | chr6 | 163148699 | <i>PRKN</i>  | c.T2C             | p.Met1?           | -     | -           | -           | -          | -         |
| EO-059    | T+M+S           | 46  | M   | Het          | AR          | chr6 | 6q26      | <i>PRKN</i>  | exon 3 del        | -                 | -     | -           | -           | -          | -         |
| EO-060    | T+M             | 12  | M   | Homo         | AR          | chr6 | 162683618 | <i>PRKN</i>  | c.350_351del      | p.Val117Glyfs*9   | novel | PVS1+PM2=LP | -           | -          | -         |
| EO-061    | T+M             | 17  | F   | Homo         | AR          | chr1 | 20975710  | <i>PINK1</i> | c.C1474T          | p.Arg492Ter       | -     | -           | 0.0005985   | 0.001      | 0.0004638 |
| EO-062    | T+M             | 22  | F   | Het, de novo | AR          | chr6 | 6q26      | <i>PRKN</i>  | exon 4 del        | -                 | -     | -           | -           | -          | -         |
| EO-062    | T+M             | 22  | F   | Het          | AR          | chr6 | 6q26      | <i>PRKN</i>  | exon 6 del        | -                 | -     | -           | -           | -          | -         |
| EO-063    | T+M             | 39  | M   | Homo         | AR          | chr6 | 6q26      | <i>PRKN</i>  | exon 2-3 del      | -                 | -     | -           | -           | -          | -         |
| EO-064    | T+M             | 28  | F   | Homo         | AR          | chr6 | 162206825 | <i>PRKN</i>  | c.G850C           | p.Gly284Arg       | -     | -           | -           | -          | -         |
| EO-065    | T+M             | 23  | F   | Homo         | AR          | chr6 | 6q26      | <i>PRKN</i>  | exon 7 del        | -                 | -     | -           | -           | -          | -         |

| Sample ID | Genetic testing | AAO | Sex | Het /Homo    | Inheritance | Chr    | Position  | Gene         | Nucleotide change | Amino acid change | Novel | ACMG           | gnomA D_EAS | 1000g _EAS | ExAC_ EAS |
|-----------|-----------------|-----|-----|--------------|-------------|--------|-----------|--------------|-------------------|-------------------|-------|----------------|-------------|------------|-----------|
| EO-066    | T+M             | 26  | M   | Homo         | AR          | chr6   | 162206825 | <i>PRKN</i>  | c.G850C           | p.Gly284 Arg      | -     | -              | -           | -          | -         |
| EO-067    | T+M             | 25  | M   | Het          | AR          | chr6   | 6q26      | <i>PRKN</i>  | exon 2-4 del      | -                 | -     | -              | -           | -          | -         |
| EO-067    | T+M             | 25  | M   | Het, de novo | AR          | chr6   | 6q26      | <i>PRKN</i>  | exon 3-4 del      | -                 | -     | -              | -           | -          | -         |
| EO-068    | T+M             | 19  | M   | Het          | AR          | chr6   | 6q26      | <i>PRKN</i>  | exon 3-4 del      | -                 | -     | -              | -           | -          | -         |
| EO-068    | T+M             | 19  | M   | Het          | AR          | chr6   | 6q26      | <i>PRKN</i>  | exon 7 del        | -                 | -     | -              | -           | -          | -         |
| EO-069    | T+M             | 37  | F   | Het          | AR          | chr6   | 6q26      | <i>PRKN</i>  | exon 6 dup        | -                 | -     | -              | -           | -          | -         |
| EO-069    | T+M             | 37  | F   | Het          | AR          | chr6   | 162394450 | <i>PRKN</i>  | c.619-1G>C        | -                 | -     | PVS1+PM2=LP    | -           | -          | -         |
| EO-070    | T+M             | 30  | F   | Homo         | AR          | chr1   | 20960214  | <i>PINK1</i> | c.173delG         | p.Val59S erfs*48  | novel | PVS1+PM2+PP4=P | -           | -          | -         |
| EO-071    | T+M             | 13  | F   | Homo         | AR          | chr6   | 162206852 | <i>PRKN</i>  | c.C823T           | p.Arg275 Trp      | -     | -              | -           | -          | -         |
| EO-072    | T+M             | 44  | F   | Het          | AD          | chr1 2 | 40704236  | <i>LRRK2</i> | c.C4321T          | p.Arg144 1Cys     | -     | -              | 0           | .          | 0         |
| EO-073    | T+M             | 25  | F   | Homo         | AR          | chr6   | 162394435 | <i>PRKN</i>  | c.A633C           | p.Lys211 Asn      | -     | -              | -           | -          | -         |
| EO-074    | T+M             | 31  | M   | Homo         | AR          | chr6   | 6q26      | <i>PRKN</i>  | exon 6-7 del      | -                 | -     | -              | -           | -          | -         |

| Sample ID | Genetic testing | AAO | Sex | Het /Homo | Inheritance | Chr  | Position  | Gene | Nucleotide change | Amino acid change | Novel | ACMG              | gnomA D_EAS | 1000g _EAS | ExAC_EAS |
|-----------|-----------------|-----|-----|-----------|-------------|------|-----------|------|-------------------|-------------------|-------|-------------------|-------------|------------|----------|
| EO-075    | T+M             | 36  | F   | Het       | AD          | chr1 | 155208006 | GBA  | c.A680G           | p.Asn227 Ser      | -     | -                 | 0           | .          | 0.0001   |
| EO-076    | T+M             | 45  | F   | Het       | AD          | chr1 | 155210420 | GBA  | c.115+1G>A        | -                 | -     | -                 | 0           | 0.001      | 0.0002   |
| EO-077    | T+M             | 49  | F   | Het       | AD          | chr1 | 155205043 | GBA  | c.T1448C          | p.Leu483 Pro      | -     | -                 | 0.0013      | 0.001      | 0.0013   |
| EO-078    | T+M             | 38  | M   | Het       | AD          | chr1 | 155210420 | GBA  | c.115+1G>A        | -                 | -     | -                 | 0           | 0.001      | 0.0002   |
| EO-079    | T+M             | 37  | F   | Het       | AD          | chr1 | 155210420 | GBA  | c.115+1G>A        | -                 | -     | -                 | 0           | 0.001      | 0.0002   |
| EO-080    | T+M             | 49  | F   | Het       | AD          | chr1 | 155210420 | GBA  | c.115+1G>A        | -                 | -     | -                 | 0           | 0.001      | 0.0002   |
| EO-081    | T+M             | 29  | F   | Het       | AD          | chr1 | 155208090 | GBA  | c.595_596del      | p.Leu199 Aspfs*62 | novel | PVS1+PM1+PM2=P    | -           | -          | 0        |
| EO-082    | T+M             | 42  | M   | Het       | AD          | chr1 | 155205043 | GBA  | c.T1448C          | p.Leu483 Pro      | -     | -                 | 0.0013      | 0.001      | 0.0013   |
| EO-083    | T+M             | 42  | F   | Het       | AD          | chr1 | 155210420 | GBA  | c.115+1G>A        | -                 | -     | -                 | 0           | 0.001      | 0.0002   |
| EO-084    | T+M             | 44  | M   | Het       | AD          | chr1 | 155205043 | GBA  | c.T1448C          | p.Leu483 Pro      | -     | -                 | 0.0013      | 0.001      | 0.0013   |
| EO-085    | T+M             | 38  | F   | Het       | AD          | chr1 | 155205605 | GBA  | c.G1255A          | p.Asp419 Asn      | novel | PM1+PM2+P3+PP4=LP | -           | -          | -        |

| Sample ID | Genetic testing | AAO | Sex | Het /Homo | Inheritance | Chr  | Position  | Gene | Nucleotide change | Amino acid change | Novel | ACMG              | gnomA D_EAS | 1000g _EAS | ExAC_ EAS |
|-----------|-----------------|-----|-----|-----------|-------------|------|-----------|------|-------------------|-------------------|-------|-------------------|-------------|------------|-----------|
| EO-086    | T+M             | 43  | F   | Het       | AD          | chr1 | 155205043 | GBA  | c.T1448C          | p.Leu483 Pro      | -     | -                 | 0.0013      | 0.001      | 0.0013    |
| EO-087    | T+M             | 34  | M   | Het       | AD          | chr1 | 155207224 | GBA  | c.C907A           | p.Leu303Ile       | -     | -                 | -           | -          | -         |
| EO-088    | T+M             | 40  | M   | Het       | AD          | chr1 | 155208412 | GBA  | c.A484G           | p.Met162 Val      | novel | PM1+PM2+P3+PP4=LP | -           | -          | 0         |
| EO-089    | T+M             | 44  | M   | Het       | AD          | chr1 | 155207932 | GBA  | c.T754A           | p.Phe252Ile       | -     | -                 | 0           | .          | 0         |
| EO-090    | T+M             | 39  | M   | Het       | AD          | chr1 | 155208061 | GBA  | c.C625T           | p.Arg209 Cys      | -     | -                 | -           | -          | 0         |
| EO-091    | T+M             | 39  | F   | Het       | AD          | chr1 | 155209424 | GBA  | c.C437T           | p.Ser146 Leu      | -     | -                 | -           | -          | 0         |
| EO-092    | T+M             | 48  | F   | Het       | AD          | chr1 | 155205043 | GBA  | c.T1448C          | p.Leu483 Pro      | -     | -                 | 0.0013      | 0.001      | 0.0013    |
| EO-093    | T+M             | 46  | F   | Het       | AD          | chr1 | 155207965 | GBA  | c.G721A           | p.Gly241 Arg      | -     | -                 | -           | -          | 0         |
| EO-094    | T+M             | 45  | F   | Het       | AD          | chr1 | 155205518 | GBA  | c.G1342C          | p.Asp448 His      | -     | -                 | 0.0006      | .          | 0         |
| EO-095    | T+M             | 40  | M   | Het       | AD          | chr1 | 155207224 | GBA  | c.C907A           | p.Leu303Ile       | -     | -                 | -           | -          | -         |
| EO-096    | T+M             | 33  | F   | Het       | AD          | chr1 | 155205043 | GBA  | c.T1448C          | p.Leu483 Pro      | -     | -                 | 0.0013      | 0.001      | 0.0013    |

| Sample ID | Genetic testing | AAO | Sex | Het /Homo | Inheritance | Chr  | Position  | Gene | Nucleotide change | Amino acid change    | Novel | ACMG               | gnomA D_EAS | 1000g _EAS | ExAC_ EAS |
|-----------|-----------------|-----|-----|-----------|-------------|------|-----------|------|-------------------|----------------------|-------|--------------------|-------------|------------|-----------|
| EO-097    | T+M             | 42  | F   | Het       | AD          | chr1 | 155207315 | GBA  | c.A816C           | p.Glu272 Asp         | -     | -                  | -           | -          | -         |
| EO-098    | T+M             | 48  | M   | Het       | AD          | chr1 | 155204818 | GBA  | c.T1579C          | p.Ser527 Pro         | -     | -                  | -           | -          | -         |
| EO-099    | T+M             | 45  | M   | Het       | AD          | chr1 | 155207202 | GBA  | c.G929A           | p.Ser310 Asn         | -     | -                  | -           | -          | -         |
| EO-100    | T+M             | 39  | F   | Het       | AD          | chr1 | 155207203 | GBA  | c.A928G           | p.Ser310 Gly         | -     | -                  | 0.0006      | .          | 0         |
| EO-101    | T+M             | 49  | M   | Het       | AD          | chr1 | 155210420 | GBA  | c.115+1G>A        | -                    | -     | -                  | 0           | 0.001      | 0.0002    |
| EO-102    | T+M             | 49  | M   | Het       | AD          | chr1 | 155206101 | GBA  | c.T1159G          | p.Trp387 Gly         | -     | -                  | -           | -          | 0.0001    |
| EO-103    | T+M             | 47  | F   | Het       | AD          | chr1 | 155207965 | GBA  | c.G721A           | p.Gly241 Arg         | -     | -                  | -           | -          | 0         |
| EO-104    | T+M             | 35  | F   | Het       | AD          | chr1 | 155207203 | GBA  | c.A928G           | p.Ser310 Gly         | -     | -                  | 0.0006      | .          | 0         |
| EO-105    | T+M             | 39  | M   | Het       | AD          | chr1 | 155208425 | GBA  | c.471delC         | p.Ile158S<br>erfs*42 | novel | PVS1+PM1+<br>PM2=P | -           | -          | -         |
| EO-106    | T+M             | 32  | F   | Het       | AD          | chr1 | 155205043 | GBA  | c.T1448C          | p.Leu483 Pro         | -     | -                  | 0.0013      | 0.001      | 0.0013    |
| EO-107    | T+M             | 45  | F   | Het       | AD          | chr1 | 155205043 | GBA  | c.T1448C          | p.Leu483 Pro         | -     | -                  | 0.0013      | 0.001      | 0.0013    |

| Sample ID | Genetic testing | AAO | Sex | Het /Homo | Inheritance | Chr       | Position  | Gene         | Nucleotide change  | Amino acid change | Novel   | ACMG                    | gnomA D_EAS | 1000g _EAS | ExAC_ EAS |
|-----------|-----------------|-----|-----|-----------|-------------|-----------|-----------|--------------|--------------------|-------------------|---------|-------------------------|-------------|------------|-----------|
| EO-108    | T+M             | 28  | M   | Het       | AD          | chr1      | 155205043 | <i>GBA</i>   | c.T1448C           | p.Leu483 Pro      | -       | -                       | 0.0013      | 0.001      | 0.0013    |
| EO-109    | T+M+S           | 48  | F   | Het       | AD          | chr1<br>7 | 44087690  | <i>MAPT</i>  | c.837 T > G        | p.Asn279 Lys      | -       | -                       | -           | -          | -         |
| EO-110    | T+M+S           | 35  | F   | Het       | AD          | chr1<br>2 | 12q24.12  | <i>ATXN2</i> | 22/37              | -                 | -       | -                       | -           | -          | -         |
| EO-111    | T+M+S           | 49  | F   | Het       | AR          | chr6      | 162475208 | <i>PRKN</i>  | c.535-2A>C         | -                 | novel   | PVS1+PM2=LP             | -           | -          | -         |
| EO-111    | T+M+S           | 49  | F   | Het       | AR          | chr6      | 161969959 | <i>PRKN</i>  | c.G1010A/exon7 del | p.Cys337 Tyr/-    | novel/- | LP (rated previously)/- | -           | -          | -         |
| EO-112    | T+M+S           | 30  | M   | Homo      | AR          | chr6      | 162206825 | <i>PRKN</i>  | c.G850C            | p.Gly284 Arg      | -       | -                       | -           | -          | -         |
| EO-113    | T+M+S           | 22  | M   | Het       | AD          | chr4      | 90749300  | <i>SNCA</i>  | c.G157A            | p.Ala53Thr        | -       | -                       | -           | -          | -         |
| EO-114    | T+M+S           | 38  | M   | Het       | AD          | chr4      | 4q22.1    | <i>SNCA</i>  | exon 1-6 dup       | -                 | -       | -                       | -           | -          | -         |
| EO-115    | T+M+S           | 28  | F   | Het       | AD          | chr1<br>4 | 14q32.12  | <i>ATXN3</i> | 27/72              | -                 | -       | -                       | -           | -          | -         |
| EO-116    | T+M+S           | 19  | F   | Het       | AR          | chr6      | 6q26      | <i>PRKN</i>  | exon 2 del         | -                 | -       | -                       | -           | -          | -         |
| EO-116    | T+M+S           | 19  | F   | Het       | AR          | chr6      | 6q26      | <i>PRKN</i>  | exon 3 del         | -                 | -       | -                       | -           | -          | -         |
| EO-117    | T+M+S           | 46  | F   | Het       | AD          | chr1<br>2 | 12q24.12  | <i>ATXN2</i> | 22/36              | -                 | -       | -                       | -           | -          | -         |



| Sample ID | Genetic testing | AAO | Sex | Het /Homo | Inheritance | Chr       | Position  | Gene         | Nucleotide change     | Amino acid change | Novel | ACMG                   | gnomA D_EAS | 1000g _EAS | ExAC_ EAS |
|-----------|-----------------|-----|-----|-----------|-------------|-----------|-----------|--------------|-----------------------|-------------------|-------|------------------------|-------------|------------|-----------|
| EO-118    | T+M+S           | 23  | F   | Homo      | AR          | chr6      | 162206825 | <i>PRKN</i>  | c.G850C               | p.Gly284 Arg      | -     | -                      | -           | -          | -         |
| EO-119    | T+M+S           | 25  | F   | Het       | AR          | chr6      | 6q26      | <i>PRKN</i>  | exon 4 del            | -                 | -     | -                      | -           | -          | -         |
| EO-119    | T+M+S           | 25  | F   | Het       | AR          | chr6      | 161781128 | <i>PRKN</i>  | c.A1277G              | p.Glu426 Gly      | novel | PM2+PM3+P3+PP4=LP      | -           | -          | -         |
| EO-120    | T+M+S           | 33  | M   | Het       | AD          | chr1<br>2 | 12q24.12  | <i>ATXN2</i> | 22/36                 | -                 | -     | -                      | -           | -          | -         |
| EO-121    | T+M+S           | 35  | M   | Het       | AD          | chr1<br>4 | 14q32.12  | <i>ATXN3</i> | 14/67                 | -                 | -     | -                      | -           | -          | -         |
| EO-122    | T+M+S           | 14  | M   | Het       | AR          | chr6      | 6q26      | <i>PRKN</i>  | exon 3 del            | -                 | -     | -                      | -           | -          | -         |
| EO-122    | T+M+S           | 14  | M   | Het       | AR          | chr6      | 162206825 | <i>PRKN</i>  | c.G850C               | p.Gly284 Arg      | -     | -                      | -           | -          | -         |
| EO-123    | T+M+S           | 26  | F   | Homo      | AR          | chr6      | 162206825 | <i>PRKN</i>  | c.G850C               | p.Gly284 Arg      | -     | -                      | -           | -          | -         |
| EO-124    | T+M+S           | 26  | F   | Het       | AR          | chr6      | 6q26      | <i>PRKN</i>  | exon 3-4 del          | -                 | -     | -                      | -           | -          | -         |
| EO-124    | T+M+S           | 26  | F   | Het       | AR          | chr6      | 162206825 | <i>PRKN</i>  | c.G850C               | p.Gly284 Arg      | -     | -                      | -           | -          | -         |
| EO-125    | T+M+S           | 21  | M   | Het       | AR          | chr6      | 6q26      | <i>PRKN</i>  | exon 2-4 triplication | -                 | novel | PVS1_Strong+PM2+PM3=LP | -           | -          | -         |

| Sample ID | Genetic testing | AAO | Sex | Het /Homo | Inheritance | Chr       | Position  | Gene         | Nucleotide change | Amino acid change   | Novel | ACMG               | gnomA D_EAS   | 1000g _EAS | ExAC_ EAS     |
|-----------|-----------------|-----|-----|-----------|-------------|-----------|-----------|--------------|-------------------|---------------------|-------|--------------------|---------------|------------|---------------|
| EO-125    | T+M+S           | 21  | M   | Het       | AR          | chr6      | 6q26      | <i>PRKN</i>  | exon 2-5 del      | -                   | -     | -                  | -             | -          | -             |
| EO-126    | T+M+S           | 20  | M   | Het       | AR          | chr1      | 20976939  | <i>PINK1</i> | c.C1501T          | p.Arg501 Ter        | -     | PVS1+PM2+<br>PM3=P | -             | -          | -             |
| EO-126    | T+M+S           | 20  | M   | Het       | AR          | chr1      | 20966445  | <i>PINK1</i> | c.C736T           | p.Arg246 Ter        | -     | -                  | 0.00021<br>88 | .          | 0.0001<br>444 |
| EO-127    | T+M+S           | 36  | M   | Het       | AD          | chr1<br>4 | 14q32.12  | <i>ATXN3</i> | 14/70             | -                   | -     | -                  | -             | -          | -             |
| EO-128    | T+M+S           | 35  | F   | Het       | AR          | chr6      | 6q26      | <i>PRKN</i>  | exon 3 del        | -                   | -     | -                  | -             | -          | -             |
| EO-128    | T+M+S           | 35  | F   | Het       | AR          | chr6      | 6q26      | <i>PRKN</i>  | exon 5 del        | -                   | -     | -                  | -             | -          | -             |
| EO-129    | T+M+S           | 32  | M   | Het       | AD          | chr1<br>2 | 12q24.12  | <i>ATXN2</i> | 22/37             | -                   | -     | -                  | -             | -          | -             |
| EO-130    | T+M+S           | 48  | F   | Het       | AD          | chr1<br>2 | 40703027  | <i>LRRK2</i> | c.A4309G          | p.Asn143<br>7Asp    | -     | -                  | -             | -          | -             |
| EO-131    | T+M+S           | 39  | M   | Het       | AD          | chr1<br>6 | 46696364  | <i>VPS35</i> | c.G1858A          | p.Asp620<br>Asn     | -     | -                  | -             | -          | -             |
| EO-132    | T+M+S           | 44  | M   | Homo      | AR          | chr6      | 162394420 | <i>PRKN</i>  | c.648delC         | p.Thr217<br>Profs*8 | novel | PVS1+PM2=<br>LP    | -             | -          | -             |
| EO-133    | T+M+S           | 44  | M   | Het       | AR          | chr6      | 6q26      | <i>PRKN</i>  | exon 3-4 del      | -                   | -     | -                  | -             | -          | -             |
| EO-133    | T+M+S           | 44  | M   | Het       | AR          | chr6      | 161771208 | <i>PRKN</i>  | c.T1321C          | p.Cys441<br>Arg     | -     | -                  | -             | -          | -             |

| Sample ID | Genetic testing | AAO | Sex | Het /Homo | Inheritance | Chr   | Position  | Gene  | Nucleotide change | Amino acid change | Novel | ACMG              | gnomA D_EAS | 1000g _EAS | ExAC_ EAS |
|-----------|-----------------|-----|-----|-----------|-------------|-------|-----------|-------|-------------------|-------------------|-------|-------------------|-------------|------------|-----------|
| EO-134    | T+M+S           | 41  | F   | Het       | AD          | chr14 | 14q32.12  | ATXN3 | 16/63             | -                 | -     | -                 | -           | -          | -         |
| EO-135    | T+M+S           | 44  | F   | Het       | AD          | chr17 | 44087690  | MAPT  | c.837 T > G       | p.Asn279 Lys      | -     | -                 | -           | -          | -         |
| EO-136    | T+M+S           | 44  | F   | Het       | AD          | chr1  | 155204987 | GBA   | c.C1504T          | p.Arg502 Cys      | -     | -                 | 0           | .          | 0         |
| EO-137    | T+M+S           | 45  | F   | Het       | AD          | chr1  | 155205518 | GBA   | c.G1342C          | p.Asp448 His      | -     | -                 | 0.0006      | .          | 0         |
| EO-138    | T+M+S           | 32  | F   | Het       | AD          | chr1  | 155205043 | GBA   | c.T1448C          | p.Leu483 Pro      | -     | -                 | 0.0013      | 0.001      | 0.0013    |
| EO-139    | T+M+S           | 34  | M   | Het       | AD          | chr1  | 155207932 | GBA   | c.T754A           | p.Phe252Ile       | -     | -                 | 0           | .          | 0         |
| EO-140    | T+M+S           | 45  | M   | Het       | AD          | chr1  | 155205043 | GBA   | c.T1448C          | p.Leu483 Pro      | -     | -                 | 0.0013      | 0.001      | 0.0013    |
| EO-141    | T+M+S           | 31  | M   | Het       | AD          | chr1  | 155208004 | GBA   | c.G682A           | p.Gly228 Arg      | novel | PM1+PM2+P3+PP4=LP | -           | -          | -         |
| EO-142    | T+M+S           | 46  | F   | Het       | AD          | chr1  | 155208420 | GBA   | c.G476A           | p.Arg159 Gln      | -     | -                 | -           | -          | 0         |
| EO-143    | T+M+S           | 45  | M   | Het       | AD          | chr1  | 155205043 | GBA   | c.T1448C          | p.Leu483 Pro      | -     | -                 | 0.0013      | 0.001      | 0.0013    |
| EO-144    | T+M+S           | 40  | M   | Het       | AD          | chr1  | 155205518 | GBA   | c.G1342C          | p.Asp448 His      | -     | -                 | 0.0006      | .          | 0         |

| Sample ID | Genetic testing | AAO | Sex | Het /Homo | Inheritance | Chr  | Position  | Gene        | Nucleotide change | Amino acid change | Novel | ACMG            | gnomA D_EAS | 1000g _EAS | ExAC_ EAS |
|-----------|-----------------|-----|-----|-----------|-------------|------|-----------|-------------|-------------------|-------------------|-------|-----------------|-------------|------------|-----------|
| EO-145    | T+M+S           | 41  | F   | Het       | AD          | chr1 | 155205043 | <i>GBA</i>  | c.T1448C          | p.Leu483 Pro      | -     | -               | 0.0013      | 0.001      | 0.0013    |
| EO-146    | T+M+S           | 48  | F   | Het       | AD          | chr1 | 155205043 | <i>GBA</i>  | c.T1448C          | p.Leu483 Pro      | -     | -               | 0.0013      | 0.001      | 0.0013    |
| EO-147    | T+M+S           | 44  | F   | Het       | AD          | chr1 | 155207932 | <i>GBA</i>  | c.T754A           | p.Phe252Ile       | -     | -               | 0           | .          | 0         |
| EO-148    | T+M+S           | 45  | M   | Het       | AD          | chr1 | 155205043 | <i>GBA</i>  | c.T1448C          | p.Leu483 Pro      | -     | -               | 0.0013      | 0.001      | 0.0013    |
| EO-149    | T+M+S           | 42  | F   | Het       | AD          | chr1 | 155205043 | <i>GBA</i>  | c.T1448C          | p.Leu483 Pro      | -     | -               | 0.0013      | 0.001      | 0.0013    |
| EO-150    | T+M+S           | 48  | F   | Het       | AD          | chr1 | 155205043 | <i>GBA</i>  | c.T1448C          | p.Leu483 Pro      | -     | -               | 0.0013      | 0.001      | 0.0013    |
| EO-151    | W+M+S           | 24  | F   | Het       | AR          | chr6 | 161807881 | <i>PRKN</i> | c.1112dup C       | p.Tyr372 Valfs*2  | novel | PVS1+PM2+ PM3=P | -           | -          | -         |
| EO-151    | W+M+S           | 24  | F   | Het       | AR          | chr6 | 6q26      | <i>PRKN</i> | exon 4-6 dup      | -                 | -     | -               | -           | -          | -         |
| EO-152    | W+M             | 29  | M   | Het       | AR          | chr6 | 6q26      | <i>PRKN</i> | exon 3-4 del      | -                 | -     | -               | -           | -          | -         |
| EO-152    | W+M             | 29  | M   | Het       | AR          | chr6 | 163148699 | <i>PRKN</i> | c.T2C             | p.Met1?           | -     | -               | -           | -          | -         |
| EO-153    | W+M             | 32  | F   | Homo      | AR          | chr6 | 6q26      | <i>PRKN</i> | exon 6-7 dup      | -                 | -     | -               | -           | -          | -         |
| EO-154    | W+M             | 18  | M   | Homo      | AR          | chr6 | 6q26      | <i>PRKN</i> | exon 4 del        | -                 | -     | -               | -           | -          | -         |

| Sample ID | Genetic testing | AAO | Sex | Het /Homo | Inheritance | Chr       | Position  | Gene          | Nucleotide change  | Amino acid change | Novel   | ACMG                    | gnomA D_EAS | 1000g _EAS | ExAC_ EAS |
|-----------|-----------------|-----|-----|-----------|-------------|-----------|-----------|---------------|--------------------|-------------------|---------|-------------------------|-------------|------------|-----------|
| EO-155    | W+M             | 28  | M   | Het       | AR          | chr6      | 6q26      | <i>PRKN</i>   | exon 2 del         | -                 | -       | -                       | -           | -          | -         |
| EO-155    | W+M             | 28  | M   | Het       | AR          | chr6      | 6q26      | <i>PRKN</i>   | exon 3-4 del       | -                 | -       | -                       | -           | -          | -         |
| EO-156    | W+M+S           | 30  | M   | Het       | AR          | chr6      | 6q26      | <i>PRKN</i>   | exon 4 del         | -                 | -       | -                       | -           | -          | -         |
| EO-156    | W+M+S           | 30  | M   | Het       | AR          | chr6      | 161771208 | <i>PRKN</i>   | c.T1321C           | p.Cys441 Arg      | -       | -                       | -           | -          | -         |
| EO-157    | W+M+S           | 25  | M   | Het       | AR          | chr6      | 6q26      | <i>PRKN</i>   | exon 3-6 dup       | -                 | -       | -                       | -           | -          | -         |
| EO-157    | W+M+S           | 25  | M   | Het       | AR          | chr6      | 6q26      | <i>PRKN</i>   | exon 7 del         | -                 | -       | -                       | -           | -          | -         |
| EO-158    | W+M             | 32  | M   | Homo      | AR          | chr1      | 20977000  | <i>PINK1</i>  | c.1562_1563del     | p.Asn521 Tfs*40   | novel   | PVS1+PM2=LP             | -           | -          | -         |
| EO-159    | W+M             | 32  | F   | Het       | AR          | chr2<br>2 | 38536094  | <i>PLA2G6</i> | c.G692T            | p.Gly231 Val      | -       | -                       | -           | -          | 0         |
| EO-159    | W+M             | 32  | F   | Het       | AR          | chr2<br>2 | 38528924  | <i>PLA2G6</i> | c.G991T            | p.Asp331 Tyr      | -       | -                       | -           | -          | 0         |
| EO-160    | W+M+S           | 42  | M   | Het       | AR          | chr6      | 161969959 | <i>PRKN</i>   | c.G1010A/exon7 del | p.Cys337 Tyr/-    | novel/- | LP (rated previously)/- | -           | -          | -         |
| EO-160    | W+M+S           | 42  | M   | Hemi      | AR          | chr6      | 162206825 | <i>PRKN</i>   | c.G850C            | p.Gly284 Arg      | -       | -                       | -           | -          | -         |
| EO-161    | W+M             | 22  | M   | Het       | AR          | chr2<br>2 | 38528876  | <i>PLA2G6</i> | c.G1039A           | p.Gly347 Arg      | -       | -                       | -           | -          | -         |

| Sample ID | Genetic testing | AAO | Sex | Het /Homo | Inheritance | Chr       | Position  | Gene          | Nucleotide change | Amino acid change   | Novel | ACMG            | gnomA D_EAS | 1000g _EAS | ExAC_ EAS |
|-----------|-----------------|-----|-----|-----------|-------------|-----------|-----------|---------------|-------------------|---------------------|-------|-----------------|-------------|------------|-----------|
| EO-161    | W+M             | 22  | M   | Het       | AR          | chr2<br>2 | 38508248  | <i>PLA2G6</i> | c.G2341A          | p.Ala781Thr         | -     | -               | -           | -          | -         |
| EO-162    | W+M+S           | 40  | F   | Het       | AR          | chr6      | 6q26      | <i>PRKN</i>   | exon 2-4<br>del   | -                   | -     | -               | -           | -          | -         |
| EO-162    | W+M+S           | 40  | F   | Het       | AR          | chr6      | 163148699 | <i>PRKN</i>   | c.T2C             | p.Met1?             | -     | -               | -           | -          | -         |
| EO-163    | W+M+S           | 39  | M   | Het       | AD          | chr4      | 90749300  | <i>SNCA</i>   | c.G157A           | p.Ala53Thr          | -     | -               | -           | -          | -         |
| EO-164    | W+M             | 43  | M   | Het       | AR          | chr6      | 162394420 | <i>PRKN</i>   | c.648delC         | p.Thr217<br>Profs*8 | novel | PVS1+PM2=<br>LP | -           | -          | -         |
| EO-164    | W+M             | 43  | M   | Het       | AR          | chr6      | 6q26      | <i>PRKN</i>   | exon 3 del        | -                   | -     | -               | -           | -          | -         |
| EO-165    | W+M             | 30  | M   | Het       | AR          | chr2<br>2 | 38512183  | <i>PLA2G6</i> | c.C1778T          | p.Pro593<br>Leu     | -     | -               | -           | -          | -         |
| EO-165    | W+M             | 30  | M   | Het       | AR          | chr2<br>2 | 38528924  | <i>PLA2G6</i> | c.G991T           | p.Asp331<br>Tyr     | -     | -               | -           | -          | 0         |
| EO-167    | W+M             | 24  | M   | Het       | AR          | chr6      | 6q26      | <i>PRKN</i>   | exon 3-4<br>del   | -                   | -     | -               | -           | -          | -         |
| EO-167    | W+M             | 24  | M   | Het       | AR          | chr6      | 6q26      | <i>PRKN</i>   | exon 5 del        | -                   | -     | -               | -           | -          | -         |
| EO-168    | W+M+S           | 33  | F   | Het       | AR          | chr6      | 6q26      | <i>PRKN</i>   | exon 6 dup        | -                   | -     | -               | -           | -          | -         |
| EO-168    | W+M+S           | 33  | F   | Het       | AR          | chr6      | 6q26      | <i>PRKN</i>   | exon 2 del        | -                   | -     | -               | -           | -          | -         |
| EO-169    | W+M             | 23  | F   | Het       | AR          | chr6      | 162206825 | <i>PRKN</i>   | c.G850C           | p.Gly284<br>Arg     | -     | -               | -           | -          | -         |
| EO-169    | W+M             | 23  | F   | Het       | AR          | chr6      | 163148699 | <i>PRKN</i>   | c.T2C             | p.Met1?             | -     | -               | -           | -          | -         |

| Sample ID | Genetic testing | AAO | Sex | Het /Homo | Inheritance | Chr       | Position | Gene          | Nucleotide change | Amino acid change | Novel | ACMG                  | gnomA D_EAS | 1000g _EAS | ExAC_ EAS |
|-----------|-----------------|-----|-----|-----------|-------------|-----------|----------|---------------|-------------------|-------------------|-------|-----------------------|-------------|------------|-----------|
| EO-170    | W+M+S           | 38  | M   | Homo      | AR          | chr6      | 6q26     | <i>PRKN</i>   | exon 2-3 del      | -                 | -     | -                     | -           | -          | -         |
| EO-171    | W+M             | 47  | M   | Het       | AR          | chr1      | 20960214 | <i>PINK1</i>  | c.173delG         | p.Val59Serfs*48   | novel | PVS1+PM2+PP4=P        | -           | -          | -         |
| EO-171    | W+M             | 47  | M   | Het       | AR          | chr1      | 20966445 | <i>PINK1</i>  | c.C736T           | p.Arg246Ter       | -     | -                     | 0.0002188   | .          | 0.0001444 |
| EO-172    | W+M+S           | 17  | M   | Het       | AR          | chr2<br>2 | 38511650 | <i>PLA2G6</i> | c.G1918A          | p.Ala640Thr       | novel | PM2+PM3+P3+PP4+PP1=LP | -           | -          | -         |
| EO-172    | W+M+S           | 17  | M   | Het       | AR          | chr2<br>2 | 38512190 | <i>PLA2G6</i> | c.C1771T          | p.Arg591Trp       | -     | -                     | -           | -          | -         |
| EO-173    | W+M             | 34  | M   | Homo      | AR          | chr6      | 6q26     | <i>PRKN</i>   | exon 4 del        | -                 | -     | -                     | -           | -          | -         |
| EO-174    | W+M             | 22  | M   | Homo      | AR          | chr1<br>1 | 2189135  | <i>TH</i>     | c.G698A           | p.Arg233His       | -     | -                     | -           | -          | -         |
| EO-175    | W+M             | 22  | M   | Homo      | AR          | chr6      | 6q26     | <i>PRKN</i>   | exon 4 del        | -                 | -     | -                     | -           | -          | -         |
| EO-176    | W+M             | 21  | F   | Het       | AR          | chr6      | 6q26     | <i>PRKN</i>   | exon 3-4 del      | -                 | -     | -                     | -           | -          | -         |
| EO-176    | W+M             | 21  | F   | Het       | AR          | chr6      | 6q26     | <i>PRKN</i>   | exon 5-6 del      | -                 | -     | -                     | -           | -          | -         |
| EO-177    | W+M             | 20  | F   | Het       | AR          | chr6      | 6q26     | <i>PRKN</i>   | exon 2 del        | -                 | -     | -                     | -           | -          | -         |
| EO-177    | W+M             | 20  | F   | Het       | AR          | chr6      | 6q26     | <i>PRKN</i>   | exon 7 del        | -                 | -     | -                     | -           | -          | -         |

| Sample ID | Genetic testing | AAO | Sex | Het /Homo | Inheritance | Chr       | Position  | Gene          | Nucleotide change | Amino acid change | Novel | ACMG              | gnomA D_EAS | 1000g _EAS | ExAC_ EAS |
|-----------|-----------------|-----|-----|-----------|-------------|-----------|-----------|---------------|-------------------|-------------------|-------|-------------------|-------------|------------|-----------|
| EO-178    | W+M+S           | NA  | M   | Het       | AR          | chr6      | 6q26      | <i>PRKN</i>   | exon 3-4 del      | -                 | -     | -                 | -           | -          | -         |
| EO-178    | W+M+S           | NA  | M   | Het       | AR          | chr6      | 162206825 | <i>PRKN</i>   | c.G850C           | p.Gly284 Arg      | -     | -                 | -           | -          | -         |
| EO-179    | W+M             | 34  | M   | Het       | AR          | chr2<br>2 | 38516874  | <i>PLA2G6</i> | c.A1634G          | p.Lys545 Arg      | -     | -                 | -           | -          | -         |
| EO-179    | W+M             | 34  | M   | Het       | AR          | chr2<br>2 | 38528924  | <i>PLA2G6</i> | c.G991T           | p.Asp331 Tyr      | -     | -                 | -           | -          | 0         |
| EO-180    | W+M+S           | 37  | M   | Het       | AR          | chr6      | 6q26      | <i>PRKN</i>   | exon 4-6 del      | -                 | -     | -                 | -           | -          | -         |
| EO-180    | W+M+S           | 37  | M   | Het       | AR          | chr6      | 161807897 | <i>PRKN</i>   | c.C1096T          | p.Arg366 Trp      | -     | -                 | -           | -          | -         |
| EO-181    | W+M             | 40  | F   | Het       | AD          | chr1      | 155207932 | <i>GBA</i>    | c.T754A           | p.Phe252Ile       | -     | -                 | 0           | .          | 0         |
| EO-182    | W+M             | 38  | F   | Het       | AD          | chr1      | 155207967 | <i>GBA</i>    | c.C719T           | p.Pro240 Leu      | novel | PM1+PM2+P3+PP4=LP | -           | -          | -         |
| EO-183    | W+M             | 44  | M   | Het       | AD          | chr1      | 155208006 | <i>GBA</i>    | c.A680G           | p.Asn227 Ser      | -     | -                 | 0           | .          | 0.0001    |
| EO-184    | W+M             | 35  | F   | Het       | AD          | chr1      | 155205043 | <i>GBA</i>    | c.T1448C          | p.Leu483 Pro      | -     | -                 | 0.0013      | 0.001      | 0.0013    |
| EO-185    | W+M             | 39  | M   | Het       | AD          | chr1      | 155205609 | <i>GBA</i>    | c.G1251A          | p.Trp417 Ter      | novel | PVS1+PM1+PM2=P    | -           | -          | -         |



| Sample ID | Genetic testing | AAO | Sex | Het /Homo | Inheritance | Chr  | Position  | Gene        | Nucleotide change | Amino acid change | Novel | ACMG | gnomA D_EAS | 1000g _EAS | ExAC_ EAS |
|-----------|-----------------|-----|-----|-----------|-------------|------|-----------|-------------|-------------------|-------------------|-------|------|-------------|------------|-----------|
| EO-186    | W+M             | 30  | F   | Het       | AD          | chr1 | 155205043 | <i>GBA</i>  | c.T1448C          | p.Leu483 Pro      | -     | -    | 0.0013      | 0.001      | 0.0013    |
| EO-187    | W+M             | 26  | M   | Het       | AD          | chr1 | 155205043 | <i>GBA</i>  | c.T1448C          | p.Leu483 Pro      | -     | -    | 0.0013      | 0.001      | 0.0013    |
| EO-188    | W+M             | 42  | F   | Het       | AD          | chr1 | 155205043 | <i>GBA</i>  | c.T1448C          | p.Leu483 Pro      | -     | -    | 0.0013      | 0.001      | 0.0013    |
| EO-189    | W+M             | 32  | F   | Het       | AD          | chr1 | 155205043 | <i>GBA</i>  | c.T1448C          | p.Leu483 Pro      | -     | -    | 0.0013      | 0.001      | 0.0013    |
| EO-190    | W+M             | 47  | M   | Het       | AD          | chr1 | 155205043 | <i>GBA</i>  | c.T1448C          | p.Leu483 Pro      | -     | -    | 0.0013      | 0.001      | 0.0013    |
| EO-191    | W+M             | 42  | M   | Het       | AD          | chr1 | 155205043 | <i>GBA</i>  | c.T1448C          | p.Leu483 Pro      | -     | -    | 0.0013      | 0.001      | 0.0013    |
| EO-192    | W+M             | 32  | F   | Het       | AD          | chr1 | 155205043 | <i>GBA</i>  | c.T1448C          | p.Leu483 Pro      | -     | -    | 0.0013      | 0.001      | 0.0013    |
| EO-193    | W+M             | 31  | M   | Het       | AD          | chr1 | 155207244 | <i>GBA</i>  | c.G887A           | p.Arg296 Gln      | -     | -    | 0           | .          | 0         |
| EO-194    | W+M             | 46  | F   | Het       | AD          | chr1 | 155205518 | <i>GBA</i>  | c.G1342C          | p.Asp448 His      | -     | -    | 0.0006      | .          | 0         |
| EO-195    | W+M+S           | 47  | M   | Het       | AR          | chr6 | 6q26      | <i>PRKN</i> | exon 3 del        |                   | -     | -    | -           | -          | -         |
| EO-195    | W+M+S           | 47  | M   | Het       | AR          | chr6 | 161771157 | <i>PRKN</i> | c.A1372C          | p.Met458 Leu      | -     | -    | -           | -          | 0         |

| Sample ID | Genetic testing | AAO | Sex | Het /Homo | Inheritance | Chr   | Position  | Gene          | Nucleotide change                | Amino acid change  | Novel | ACMG           | gnomA D_EAS | 1000g _EAS | ExAC_ EAS |
|-----------|-----------------|-----|-----|-----------|-------------|-------|-----------|---------------|----------------------------------|--------------------|-------|----------------|-------------|------------|-----------|
| EO-196    | W+M+S           | 41  | M   | Het       | AD          | chr14 | 14q32.12  | <i>ATXN3</i>  | 14/63                            | -                  | -     | -              | -           | -          | -         |
| EO-197    | W+M+S           | 44  | F   | Het       | AD          | chr12 | 12q24.12  | <i>ATXN2</i>  | 19/35                            | -                  | -     | -              | -           | -          | -         |
| EO-198    | W+M+S           | 45  | M   | Het       | AD          | chr7  | 56170571  | <i>CHCHD2</i> | c.G434A                          | p.Arg145 Gln       | -     | -              | -           | -          | 0         |
| EO-199    | W+M+S           | 29  | M   | Het       | AR          | chr6  | 161781188 | <i>PRKN</i>   | c.1216_1217insGCTC GTTGGGA AGCAG | p.Ala406 Glyfs*168 | novel | PVS1+PM2=LP    | -           | -          | -         |
| EO-199    | W+M+S           | 29  | M   | Het       | AR          | chr6  | 162206825 | <i>PRKN</i>   | c.G850C                          | p.Gly284 Arg       | -     | -              | -           | -          | -         |
| EO-200    | W+M+S           | 29  | M   | Het       | AR          | chr6  | 162394451 | <i>PRKN</i>   | c.619-2A>G                       | -                  | novel | PVS1+PM2+PM3=P | -           | -          | -         |
| EO-200    | W+M+S           | 29  | M   | Het       | AR          | chr6  | 161771208 | <i>PRKN</i>   | c.T1321C                         | p.Cys441 Arg       | -     | -              | -           | -          | -         |
| EO-201    | W+M+S           | 33  | M   | Het       | AR          | chr6  | 6q26      | <i>PRKN</i>   | exon 3 del                       | -                  | -     | -              | -           | -          | -         |
| EO-201    | W+M+S           | 33  | M   | Het       | AR          | chr6  | 6q26      | <i>PRKN</i>   | exon 5 del                       | -                  | -     | -              | -           | -          | -         |
| EO-202    | W+M+S           | 25  | M   | Het       | AR          | chr22 | 38512190  | <i>PLA2G6</i> | c.C1771T                         | p.Arg591 Trp       | -     | -              | -           | -          | -         |

| Sample ID | Genetic testing | AAO | Sex | Het /Homo | Inheritance | Chr       | Position  | Gene          | Nucleotide change | Amino acid change | Novel | ACMG                          | gnomA D_EAS  | 1000g _EAS | ExAC_ EAS |
|-----------|-----------------|-----|-----|-----------|-------------|-----------|-----------|---------------|-------------------|-------------------|-------|-------------------------------|--------------|------------|-----------|
| EO-202    | W+M+S           | 25  | M   | Het       | AR          | chr2<br>2 | 38511623  | <i>PLA2G6</i> | c.C1945T          | p.Arg649<br>Cys   | -     | PM2+PM3+P<br>P1+PP3+PP<br>4=P | -            | -          | -         |
| EO-203    | W+M+S           | 16  | F   | Het       | AR          | chr6      | 163148699 | <i>PRKN</i>   | c.T2C             | p.Met1?           | -     | -                             | -            | -          | -         |
| EO-203    | W+M+S           | 16  | F   | Het       | AR          | chr6      | 6q26      | <i>PRKN</i>   | exon 3 del        | -                 | -     | -                             | -            | -          | -         |
| EO-204    | W+M+S           | 16  | F   | Het       | AR          | chr6      | 6q26      | <i>PRKN</i>   | exon 3-4<br>del   | -                 | -     | -                             | -            | -          | -         |
| EO-204    | W+M+S           | 16  | F   | Het       | AR          | chr6      | 6q26      | <i>PRKN</i>   | exon 7 del        | -                 | -     | -                             | -            | -          | -         |
| EO-205    | W+M+S           | 49  | F   | Het       | AD          | chr4      | 4q22.1    | <i>SNCA</i>   | exon 1-6<br>dup   | -                 | -     | -                             | -            | -          | -         |
| EO-206    | W+M+S           | 23  | F   | Het       | AR          | chr2<br>2 | 38519141  | <i>PLA2G6</i> | c.A1552G          | p.Thr518<br>Ala   | novel | PM2+PM3+P<br>P3+PP4=LP        | -            | -          | -         |
| EO-206    | W+M+S           | 23  | F   | Het       | AR          | chr2<br>2 | 38528924  | <i>PLA2G6</i> | c.G991T           | p.Asp331<br>Tyr   | -     | -                             | -            | -          | 0         |
| EO-207    | W+M+S           | 47  | M   | Het       | AD          | chr1      | 155205043 | <i>GBA</i>    | c.T1448C          | p.Leu483<br>Pro   | -     | -                             | 0.0013       | 0.001      | 0.0013    |
| EO-208    | W+M+S           | 43  | F   | Het       | AD          | chr1      | 155205043 | <i>GBA</i>    | c.T1448C          | p.Leu483<br>Pro   | -     | -                             | 0.0013       | 0.001      | 0.0013    |
| f-LO-001  | T+M+S           | 53  | F   | Het       | AD          | chr2      | 74758693  | <i>HTRA2</i>  | c.940-<br>1G>C    | -                 | novel | PVS1+PM2=<br>LP               | 0.00288<br>3 | 0.002      | -         |
| f-LO-002  | T+M+S           | 50  | F   | Het       | AD          | chr1<br>4 | 73664814  | <i>PSEN1</i>  | c.T845G           | p.Leu282<br>Arg   | -     | -                             | -            | -          | -         |

| Sample ID | Genetic testing | AAO | Sex | Het /Homo | Inheritance | Chr       | Position  | Gene  | Nucleotide change | Amino acid change | Novel | ACMG              | gnomA D_EAS | 1000g _EAS | ExAC_ EAS |
|-----------|-----------------|-----|-----|-----------|-------------|-----------|-----------|-------|-------------------|-------------------|-------|-------------------|-------------|------------|-----------|
| f-LO-003  | T+M+S           | 61  | M   | Het       | AD          | chr4      | 4q22.1    | SNCA  | exon 1-6 dup      | -                 | -     | -                 | -           | -          | -         |
| f-LO-004  | T+M+S           | 52  | F   | Het       | AD          | chr1<br>2 | 12q24.12  | ATXN2 | 20/36             | -                 | -     | -                 | -           | -          | -         |
| f-LO-005  | T+M+S           | 55  | F   | Het       | AD          | chr1<br>2 | 12q24.12  | ATXN2 | 22/35             | -                 | -     | -                 | -           | -          | -         |
| f-LO-006  | T+M+S           | 62  | M   | Het       | AD          | chr1      | 155204793 | GBA   | c.G1604A          | p.Arg535 His      | -     | -                 | 0           | .          | 0         |
| f-LO-007  | T+M+S           | 51  | M   | Het       | AD          | chr1      | 155205043 | GBA   | c.T1448C          | p.Leu483 Pro      | -     | -                 | 0.0013      | 0.001      | 0.0013    |
| f-LO-008  | T+M+S           | 50  | M   | Het       | AD          | chr1      | 155205548 | GBA   | c.G1312A          | p.Asp438 Asn      | -     | -                 | -           | -          | -         |
| f-LO-009  | T+M+S           | 51  | F   | Het       | AD          | chr1      | 155207203 | GBA   | c.A928G           | p.Ser310 Gly      | -     | -                 | 0.0006      | .          | 0         |
| f-LO-010  | T+M+S           | 57  | F   | Het       | AD          | chr1      | 155205043 | GBA   | c.T1448C          | p.Leu483 Pro      | -     | -                 | 0.0013      | 0.001      | 0.0013    |
| f-LO-011  | T+M+S           | 56  | M   | Het       | AD          | chr1      | 155205620 | GBA   | c.G1240C          | p.Val414Leu       | novel | PM1+PM2+P3+PP4=LP | -           | -          | 0         |
| f-LO-012  | T+M+S           | 52  | M   | Het       | AD          | chr1      | 155205518 | GBA   | c.G1342C          | p.Asp448 His      | -     | -                 | 0.0006      | .          | 0         |
| f-LO-013  | T+M+S           | 60  | F   | Het       | AD          | chr1      | 155205043 | GBA   | c.T1448C          | p.Leu483 Pro      | -     | -                 | 0.0013      | 0.001      | 0.0013    |

| Sample ID | Genetic testing | AAO | Sex | Het /Homo | Inheritance | Chr  | Position  | Gene         | Nucleotide change | Amino acid change | Novel | ACMG                            | gnomA D_EAS | 1000g _EAS | ExAC_ EAS |
|-----------|-----------------|-----|-----|-----------|-------------|------|-----------|--------------|-------------------|-------------------|-------|---------------------------------|-------------|------------|-----------|
| f-LO-014  | T+M+S           | 53  | F   | Het       | AD          | chr1 | 155205043 | <i>GBA</i>   | c.T1448C          | p.Leu483 Pro      | -     | -                               | 0.0013      | 0.001      | 0.0013    |
| f-LO-015  | T+M+S           | 52  | F   | Het       | AD          | chr1 | 155208006 | <i>GBA</i>   | c.A680G           | p.Asn227 Ser      | -     | -                               | 0           | .          | 0.0001    |
| f-LO-016  | T+M+S           | 50  | F   | Het       | AD          | chr1 | 155205043 | <i>GBA</i>   | c.T1448C          | p.Leu483 Pro      | -     | -                               | 0.0013      | 0.001      | 0.0013    |
| f-LO-017  | W+M+S           | 62  | F   | Het       | AD          | chr4 | 4q22.1    | <i>SNCA</i>  | exon 1-6 dup      | -                 | -     | -                               | -           | -          | -         |
| f-LO-018  | W+M+S           | 50  | F   | Het       | AD          | chr2 | 74605174  | <i>DCTN1</i> | c.T232C           | p.Tyr78His        | -     | -                               | -           | -          | -         |
| f-LO-019  | W+M+S           | 70  | M   | Het       | AD          | chr1 | 155207983 | <i>GBA</i>   | c.T703C           | p.Ser235 Pro      | -     | -                               | 0           | .          | 0         |
| f-LO-020  | W+M+S           | 60  | M   | Het       | AD          | chr1 | 155206037 | <i>GBA</i>   | c.C1223T          | p.Thr408 Met      | -     | reported as risk variants in PD | 0           | .          | 0.0001    |
| f-LO-021  | W+M+S           | 74  | F   | Het       | AD          | chr1 | 155208421 | <i>GBA</i>   | c.C475T           | p.Arg159 Trp      | -     | -                               | 0           | .          | -         |

Abbreviations: AAO, age at onset; ACMG: the American College of Medical Genetics and Genomics AD, autosomal dominant model; A, atypical group; AR, autosomal recessive model; EAS, East Asian; EO, early-onset group; F, female; f-LO, familial late-onset group; LP, likely pathogenic; M, male; N, the variant is not novel; P, pathogenic. PD, Parkinson's disease; T+M: Target sequencing and multiplex ligation-dependent probe amplification of 8 genes related with

Parkinson' s disease; T+M+S: Target sequencing, multiplex ligation-dependent probe amplification of 8 genes related with Parkinson' s disease and testing of dynamic variants of spinocerebellar ataxias; W+M: Whole-exome sequencing and multiplex ligation-dependent probe amplification of 8 genes related with Parkinson' s disease; W+M+S: Whole-exome sequencing, multiplex ligation-dependent probe amplification of 8 genes related with Parkinson' s disease and testing of dynamic variants of spinocerebellar ataxias; - in ACMG column indicates the variant is previously reported as pathogenic; - in gnomAD EAS, 1000g EAS, ExAC-EAS indicates the variant is not reported in the database.

PVS, PM, PP in the ACMG column means different weight of pathogenic criterion as 'very strong', 'moderate' and 'supporting' according to ACMG guideline.

**Supplementary Table 3.** The neuropsychiatric assessments of the patients with pathogenic/likely pathogenic variants in *GBA*, *PRKN*, *PLA2G6* and genetic undefined patients in early-onset group.

| Clinical features                          | GU-EOPD<br>(N=429) | <i>PRKN</i><br>(N=100) | <i>GBA</i><br>(N=65) | <i>PLA2G6</i><br>(N=12) | P (patients with specific gene vs.<br>GU-EOPD) |                 |                              |
|--------------------------------------------|--------------------|------------------------|----------------------|-------------------------|------------------------------------------------|-----------------|------------------------------|
|                                            |                    |                        |                      |                         | <i>PRKN</i>                                    | <i>GBA</i>      | <i>PLA2G6</i>                |
| Sex, female (%)                            | 160 (37.30)        | 41 (41.00)             | 36 (55.38)           | 5 (41.67)               | 0.4920                                         | <b>0.0055**</b> | 0.7576                       |
| Education, years                           | 12.00 (6.00)       | 12.00 (6.00)           | 11.00 (7.00)         | 12.50 (8.00)            | 0.9253                                         | 0.6765          | 0.6058                       |
| AAO, years                                 | 41.00 (9.00)       | 27.00 (11.00)          | 42.00 (8.00)         | 27.00 (8.00)            | <b>0.0001**</b>                                | 0.4419          | <b>0.0001**</b>              |
| Age at examination, years                  | 45.00 (11.00)      | 37.00 (13.50)          | 45.00 (10.00)        | 30.00 (4.50)            | <b>0.0001**</b>                                | 0.7449          | <b>0.0001**</b>              |
| Disease duration, month                    | 43.00 (60.00)      | 93.0 (123.50)          | 31.00 (54.00)        | 33.00 (39.00)           | <b>0.0001**</b>                                | <b>0.0314*</b>  | 0.3928                       |
| LEDD, mg                                   | 450.00 (400.00)    | 350.00 (400.00)        | 475.00 (375.00)      | 350.00 (400.00)         | <b>0.0034*</b>                                 | 0.1294          | 0.8828                       |
| <b>Raw neuropsychological tests scores</b> |                    |                        |                      |                         |                                                |                 |                              |
| <b>Memory</b>                              |                    |                        |                      |                         |                                                |                 |                              |
| AVLT-T, score                              | 28.00 (13.00)      | 29.00 (11.00)          | 27.50 (15.00)        | 20.50 (9.00)            | 0.1247                                         | 0.3446          | <b>0.0290*<sup>a</sup></b>   |
| AVLT-delay recall, score                   | 5.00 (3.00)        | 6.00 (4.00)            | 5.00 (4.00)          | 2.00 (2.00)             | 0.1786                                         | 0.7955          | <b>0.0175*<sup>a</sup></b>   |
| CFT-delay recall, score                    | 16.00 (11.00)      | 16.00 (9.00)           | 14.50 (13.00)        | 7.50 (7.00)             | 0.9052                                         | 0.4938          | <b>0.0046***<sup>a</sup></b> |
| <b>Executive function</b>                  |                    |                        |                      |                         |                                                |                 |                              |
| CWT-time, second                           | 72.00 (31.00)      | 63.00 (26.00)          | 76.00 (32.00)        | 95.00 (57.00)           | <b>0.0034**</b>                                | 0.9435          | 0.0916 <sup>a</sup>          |
| CWT-right, score                           | 48.00 (4.00)       | 49.00 (4.00)           | 47.00 (4.00)         | 44.00 (6.00)            | <b>0.0116*</b>                                 | 0.2160          | 0.0590 <sup>a</sup>          |
| TMT-B, second                              | 125.50 (67.50)     | 99.00 (50.00)          | 107.50 (68.00)       | 128.00 (164.00)         | <b>0.0001***<sup>a</sup></b>                   | 0.0996          | 0.4214 <sup>a</sup>          |
| <b>Language</b>                            |                    |                        |                      |                         |                                                |                 |                              |
| BNT, score                                 | 24.00 (5.50)       | 24.50 (4.50)           | 22.00 (6.50)         | 17.50 (11.00)           | 0.2308                                         | 0.1322          | <b>0.0158*<sup>a</sup></b>   |
| AFT, score                                 | 17.00 (7.00)       | 19.50 (8.00)           | 16.00 (7.00)         | 12.00(11.00)            | <b>0.0006***<sup>a</sup></b>                   | 0.7737          | 0.3394                       |

| Clinical features                   | GU-EOPD<br>(N=429) | PRKN<br>(N=100) | GBA<br>(N=65) | PLA2G6<br>(N=12) | P (patients with specific gene vs.<br>GU-EOPD) |                     |                            |
|-------------------------------------|--------------------|-----------------|---------------|------------------|------------------------------------------------|---------------------|----------------------------|
|                                     |                    |                 |               |                  | PRKN                                           | GBA                 | PLA2G6                     |
| <b>Visuospatial function</b>        |                    |                 |               |                  |                                                |                     |                            |
| CFT, score                          | 34.00 (3.00)       | 34.00 (3.00)    | 33.00 (4.50)  | 31.00 (17.00)    | 0.8831                                         | 0.1307 <sup>a</sup> | 0.2764                     |
| CDT, score                          | 21.00 (9.00)       | 21.00 (6.00)    | 18.00 (12.00) | 15.00 (9.00)     | 0.9679                                         | 0.4479              | <b>0.0131</b> <sup>a</sup> |
| <b>Attention and working memory</b> |                    |                 |               |                  |                                                |                     |                            |
| SDMT, score                         | 41.00 (18.00)      | 45.00 (18.00)   | 46.00 (23.00) | 27.00 (12.00)    | <b>0.0022</b> <sup>**</sup>                    | 0.1118              | 0.0519 <sup>a</sup>        |
| TMT-A, second                       | 53.00 (24.00)      | 46.00 (20.00)   | 49.00 (27.00) | 59.00 (66.00)    | <b>0.0001</b> <sup>***a</sup>                  | 0.1896              | <b>0.0481</b> <sup>a</sup> |

**Abbreviations:** AAO: age at onset; AFT: Animal Fluency Test; AVLT: Auditory Verbal Learning Test; AVLT-T: Auditory Verbal Learning Test total score; BDI: Beck Depression Inventory; BNT: Boston Naming Test; CDT: Clock Drawing Test; CFT: Rey-Osterrieth Complex Figure Test; CWT: Stroop Color-Word Test; EOPD: early-onset PD; GU: genetically undefined; LEDD: Levodopa equivalent dose daily; SDMT: Symbol Digit Modalities Test; TMT: Trail Making Test.

The continuous data are presented as median (interquartile range, IQR).

Note: P: Comparison between the early-onset group with pathogenic/likely pathogenic variants in specific genes and GU-EOPD group. \*P < 0.05, \*\* P < 0.001,

<sup>a</sup> significant after adjustment for age, gender, education, disease duration, and levodopa dose equivalents.



**Supplementary Table 4.** Clinical features of the patients carrying pathogenic/likely pathogenic variants in PD causative genes with patient number less than 10 in early-onset group or familial late-onset group

| Clinical features                          | EO-198                              | EO-019                            | EO-072                              | EO-130                              | EO-131                             | f-LO-001                          | f-LO-017                          | f-LO-003                          | Reference |
|--------------------------------------------|-------------------------------------|-----------------------------------|-------------------------------------|-------------------------------------|------------------------------------|-----------------------------------|-----------------------------------|-----------------------------------|-----------|
| Variants                                   | <i>CHCHD2</i><br>p.Arg145Gln<br>het | <i>DJ-1</i><br>p.Val71del<br>homo | <i>LRRK2</i><br>p.Arg1441Cys<br>het | <i>LRRK2</i><br>p.Asn1437Asp<br>het | <i>VPS35</i><br>p.Asp620Asn<br>het | <i>HTRA2</i><br>c.940-1G>C<br>het | <i>SNCA</i><br>Duplication<br>het | <i>SNCA</i><br>Duplication<br>het |           |
| Family history                             | AD                                  | Consanguineous marriage           | Absent                              | AD                                  | AD                                 | AD                                | AD                                | AD                                |           |
| AAO, years                                 | 45                                  | 6                                 | 44                                  | 48                                  | 39                                 | 53                                | 62                                | 61                                |           |
| Disease duration, months                   | 20                                  | 338                               | 32                                  | 128                                 | 31                                 | 77                                | 46                                | 30                                |           |
| UPDRS-Part III, score (Med off)            | 13                                  | 52                                | 18                                  | 33                                  | 40                                 | 29 (med-on)                       | 47                                | 32                                |           |
| Hoehn and Yahr stage                       | 1                                   | 4                                 | 1                                   | 3                                   | 2                                  | 2                                 | 2                                 | 2                                 |           |
| <b>Non-motor manifestations</b>            |                                     |                                   |                                     |                                     |                                    |                                   |                                   |                                   |           |
| BDI, score                                 | 11                                  | 7                                 | 9                                   | 20↓                                 | 0                                  | NA                                | 33↓                               | 19↓                               | [1]       |
| PDQ39, score                               | 17                                  | 74                                | 26                                  | 64                                  | 2                                  | 15                                | 26                                | 10                                |           |
| NMSQ, score                                | 2                                   | 22                                | 12                                  | 20                                  | 3                                  | NA                                | 24                                | 7                                 |           |
| ESS, score                                 | 1                                   | 8↓                                | 9↓                                  | 12↓                                 | 3                                  | NA                                | 10↓                               | 6                                 | [2]       |
| RBDSQ, score                               | 1                                   | 7↓                                | 1                                   | 3                                   | 2                                  | NA                                | 4                                 | 1                                 | [3]       |
| SSST-12, score                             | 6↓                                  | 9↓                                | 5↓                                  | 7↓                                  | 6↓                                 | NA                                | NA                                | NA                                | [4]       |
| <b>Raw neuropsychological tests scores</b> |                                     |                                   |                                     |                                     |                                    |                                   |                                   |                                   |           |
| MMSE, score                                | 29                                  | 28                                | 29                                  | 24↓                                 | 28                                 | NA                                | 19↓                               | 25                                | [5]       |

| Clinical features                   | EO-198                              | EO-019                            | EO-072                              | EO-130                              | EO-131                             | f-LO-001                          | f-LO-017                          | f-LO-003                          | Reference |
|-------------------------------------|-------------------------------------|-----------------------------------|-------------------------------------|-------------------------------------|------------------------------------|-----------------------------------|-----------------------------------|-----------------------------------|-----------|
| Variants                            | <i>CHCHD2</i><br>p.Arg145Gln<br>het | <i>DJ-1</i><br>p.Val71del<br>homo | <i>LRRK2</i><br>p.Arg1441Cys<br>het | <i>LRRK2</i><br>p.Asn1437Asp<br>het | <i>VPS35</i><br>p.Asp620Asn<br>het | <i>HTRA2</i><br>c.940-1G>C<br>het | <i>SNCA</i><br>Duplication<br>het | <i>SNCA</i><br>Duplication<br>het |           |
| <b>Memory</b>                       |                                     |                                   |                                     |                                     |                                    |                                   |                                   |                                   |           |
| AVLT-delay recall, score            | 5                                   | 0↓                                | 7                                   | 6                                   | 9                                  | NA                                | NA                                | 3                                 | [6]       |
| AVLT-T, score                       | 24                                  | 11↓                               | 36                                  | 23                                  | 50                                 | NA                                | NA                                | 16↓                               | [6]       |
| CFT-delay recall, score             | 20                                  | 3                                 | 21                                  | 12                                  | 23                                 | NA                                | 17                                | 7                                 |           |
| <b>Executive function</b>           |                                     |                                   |                                     |                                     |                                    |                                   |                                   |                                   |           |
| CWT time, second                    | 91                                  | 108                               | 65                                  | 50                                  | 63                                 | NA                                | 60                                | 99                                |           |
| CWT right, score                    | 50                                  | 47                                | 46                                  | 38                                  | 50                                 | NA                                | 48                                | 46                                |           |
| TMT-B, second                       | 138                                 | 191↓                              | 90                                  | 164                                 | 65                                 | NA                                | 282↓                              | 136                               | [7]       |
| <b>Language</b>                     |                                     |                                   |                                     |                                     |                                    |                                   |                                   |                                   |           |
| BNT, score                          | 23                                  | 28                                | 25                                  | 13                                  | 23                                 | NA                                | 13                                | 21                                |           |
| AFT, score                          | 23                                  | 8                                 | 23                                  | 12                                  | 13                                 | NA                                | 8                                 | 11                                |           |
| <b>Visuospatial function</b>        |                                     |                                   |                                     |                                     |                                    |                                   |                                   |                                   |           |
| CFT, score                          | 33                                  | 26                                | 36                                  | 33                                  | 35                                 | NA                                | 17                                | 29                                |           |
| CDT, score                          | 15                                  | 21                                | 19                                  | 21                                  | 13                                 | NA                                | 23                                | 22                                |           |
| <b>Attention and working memory</b> |                                     |                                   |                                     |                                     |                                    |                                   |                                   |                                   |           |
| SDMT, score                         | 33                                  | 28                                | 60                                  | 24                                  | 43                                 | NA                                | 21                                | 26                                |           |
| TMT-A, second                       | 34                                  | 71                                | 54                                  | 57                                  | 40                                 | NA                                | 130↓                              | 59                                | [7]       |

| Clinical features                          | EO-113                           | EO-114                            | EO-163                           | EO-205                            | EO-061                              | EO-070                                      | EO-158                                     | EO-126                                                       | EO-171                                                           | Reference |
|--------------------------------------------|----------------------------------|-----------------------------------|----------------------------------|-----------------------------------|-------------------------------------|---------------------------------------------|--------------------------------------------|--------------------------------------------------------------|------------------------------------------------------------------|-----------|
| Variants                                   | <i>SNCA</i><br>p.Ala53Thr<br>het | <i>SNCA</i><br>Duplication<br>het | <i>SNCA</i><br>p.Ala53Thr<br>het | <i>SNCA</i><br>Duplication<br>het | <i>PINK1</i><br>p.Arg492Ter<br>homo | <i>PINK1</i><br>p.Val59Ser<br>fs*48<br>homo | <i>PINK1</i><br>p.Asn521<br>Tfs*40<br>homo | <i>PINK1</i><br>p.Arg501Ter &<br>p.Arg246Ter<br>compound het | <i>PINK1</i><br>p.Arg246Ter &<br>p.Val59Serfs*48<br>compound het |           |
| Family history                             | AD                               | AD                                | AD                               | AD                                | Absent                              | Absent                                      | Absent                                     | AD                                                           | Absent                                                           |           |
| AAO, years                                 | 22                               | 38                                | 39                               | 49                                | 17                                  | 30                                          | 32                                         | 20                                                           | 47                                                               |           |
| Disease duration, months                   | 23                               | 100                               | 168                              | 12                                | 122                                 | 14                                          | 126                                        | 25                                                           | 44                                                               |           |
| UPDRS-Part III, score (Med off)            | 47                               | 22                                | 31                               | 39                                | 33                                  | 35                                          | 53                                         | 6                                                            | 23 (Med-on)                                                      |           |
| Hoehn and Yahr stage                       | 3                                | 3                                 | 2                                | 2                                 | 3                                   | 2                                           | 3                                          | 1                                                            | 2                                                                |           |
| <b>Non-motor manifestations</b>            |                                  |                                   |                                  |                                   |                                     |                                             |                                            |                                                              |                                                                  |           |
| BDI, score                                 | 18↓                              | 20↓                               | 12                               | 10                                | 34↓                                 | 4                                           | 16↓                                        | 2                                                            | NA                                                               | [1]       |
| PDQ39, score                               | 51                               | 71                                | 29                               | 20                                | 54                                  | 6                                           | 31                                         | 5                                                            | 19                                                               |           |
| NMSQ, score                                | 10                               | 18                                | 13                               | 11                                | 14                                  | 0                                           | 3                                          | 5                                                            | NA                                                               |           |
| ESS, score                                 | 4                                | 22↓                               | 7                                | 7                                 | 9↓                                  | 4                                           | 3                                          | 7                                                            | NA                                                               | [2]       |
| RBDSQ, score                               | 1                                | 12↓                               | 13↓                              | 4                                 | 8↓                                  | 3                                           | 6↓                                         | 2                                                            | NA                                                               | [3]       |
| SSST-12, score                             | 4↓                               | 2↓                                | 6↓                               | 2↓                                | 7↓                                  | 10                                          | 8                                          | 12                                                           | NA                                                               | [4]       |
| <b>Raw neuropsychological tests scores</b> |                                  |                                   |                                  |                                   |                                     |                                             |                                            |                                                              |                                                                  |           |
| MMSE, score                                | 29                               | 30                                | 27                               | 27                                | 21↓                                 | 29                                          | 27                                         | 30                                                           | NA                                                               | [5]       |
| <b>Memory</b>                              |                                  |                                   |                                  |                                   |                                     |                                             |                                            |                                                              |                                                                  |           |
| AVLT-delay recall, score                   | 6                                | 4↓                                | 8                                | 6                                 | 3↓                                  | 7                                           | 6                                          | 7                                                            | NA                                                               | [6]       |

| Clinical features                   | EO-113                           | EO-114                            | EO-163                           | EO-205                            | EO-061                              | EO-070                                      | EO-158                                     | EO-126                                                       | EO-171                                                           | Reference |
|-------------------------------------|----------------------------------|-----------------------------------|----------------------------------|-----------------------------------|-------------------------------------|---------------------------------------------|--------------------------------------------|--------------------------------------------------------------|------------------------------------------------------------------|-----------|
| <b>Variants</b>                     | <i>SNCA</i><br>p.Ala53Thr<br>het | <i>SNCA</i><br>Duplication<br>het | <i>SNCA</i><br>p.Ala53Thr<br>het | <i>SNCA</i><br>Duplication<br>het | <i>PINK1</i><br>p.Arg492Ter<br>homo | <i>PINK1</i><br>p.Val59Ser<br>fs*48<br>homo | <i>PINK1</i><br>p.Asn521<br>Tfs*40<br>homo | <i>PINK1</i><br>p.Arg501Ter &<br>p.Arg246Ter<br>compound het | <i>PINK1</i><br>p.Arg246Ter &<br>p.Val59Serfs*48<br>compound het |           |
| AVLT-T, score                       | 32                               | 27                                | 36                               | 18↓                               | 13↓                                 | 33                                          | 28                                         | 36                                                           | NA                                                               | [6]       |
| CFT-delay recall,<br>score          | 32                               | 5↓                                | 14                               | 7↓                                | 10                                  | 32                                          | 17                                         | 34                                                           | NA                                                               |           |
| <b>Executive function</b>           |                                  |                                   |                                  |                                   |                                     |                                             |                                            |                                                              |                                                                  |           |
| CWT time, second                    | 80                               | 65                                | 70                               | 63                                | 154↓                                | 58                                          | 91                                         | 58                                                           | NA                                                               |           |
| CWT right, score                    | 49                               | 50                                | 48                               | 40                                | 22↓                                 | 50                                          | 35↓                                        | 49                                                           | NA                                                               |           |
| TMT-B, second                       | 115                              | 94                                | 156                              | 291↓                              | 182                                 | 82                                          | 94                                         | 55                                                           | NA                                                               | [7]       |
| <b>Language</b>                     |                                  |                                   |                                  |                                   |                                     |                                             |                                            |                                                              |                                                                  |           |
| BNT, score                          | 27                               | 29                                | 25                               | 14↓                               | 14↓                                 | 26                                          | 26                                         | 28                                                           | NA                                                               |           |
| AFT, score                          | 15                               | 19                                | 20                               | 7↓                                | 17                                  | 27                                          | 12                                         | 33                                                           | NA                                                               |           |
| <b>Visuospatial function</b>        |                                  |                                   |                                  |                                   |                                     |                                             |                                            |                                                              |                                                                  |           |
| CFT, score                          | 36                               | 30↓                               | 35                               | 23↓                               | 29↓                                 | 36                                          | 31↓                                        | 30                                                           | NA                                                               |           |
| CDT, score                          | 28                               | 17                                | 15↓                              | 20                                | 10↓                                 | 21                                          | 23                                         | 30                                                           | NA                                                               |           |
| <b>Attention and working memory</b> |                                  |                                   |                                  |                                   |                                     |                                             |                                            |                                                              |                                                                  |           |
| SDMT, score                         | 49                               | 61                                | 24↓                              | 28↓                               | 37                                  | 59                                          | 48                                         | 65                                                           | NA                                                               |           |
| TMT-A, second                       | 49                               | 42                                | 80↓                              | 140↓                              | 182↓                                | 35                                          | 51                                         | 18                                                           | NA                                                               | [7]       |

**Abbreviations:**

AVLT: Auditory Verbal Learning Test; AVLT-T: Auditory Verbal Learning Test total score; BDI: Beck Depression Inventory; BNT: Boston Naming Test; CDT: Clock Drawing Test; CFT: Rey-Osterrieth Complex Figure Test; CWT: Stroop Color-Word Test; EO: the early-onset group; ESS: Epworth Sleepiness Score; f-LO: the familial late-onset group; LEDD: Levodopa equivalent dose daily; MMSE: Mini Mental State Examination; NMSQ: Non-Motor Symptoms Questionnaire; PD: Parkinson's disease; PDQ39: 39-item Parkinson's disease questionnaire; RBDSQ: Rapid-Eye-Movement Sleep Behavior Disorder Screening Questionnaire; SDMT: Symbol Digit Modalities Test; SSST-12: Sniffin' Sticks screening 12 test; TMT: Trail Making Test; UPDRS: Unified Parkinson's Disease Rating Scale; NA: not available; ↓: impairment of non-motor symptoms, or cognition impairment of the cognitive test according to the references with cutoff score of each test by age and education level.

**Reference:**

1. Visser M, Leentjens AF, Marinus J, Stiggelbout AM, van Hilten JJ. Reliability and validity of the Beck depression inventory in patients with Parkinson's disease. *Mov Disord.* 2006 May;21(5):668-72.
2. Kurtis MM, Balestrino R, Rodriguez-Blazquez C, Forjaz MJ, Martinez-Martin P. A Review of Scales to Evaluate Sleep Disturbances in Movement Disorders. *Front Neurol.* 2018 May 29;9:369.
3. Stiasny-Kolster K, Mayer G, Schäfer S, Möller JC, Heinzel-Gutenbrunner M, Oertel WH. The REM sleep behavior disorder screening questionnaire -a new diagnostic instrument. *Mov Disord.* 2007 Dec;22(16):2386-93.
4. Hummel T, Konnerth CG, Rosenheim K, Kobal G. Screening of olfactory function with a four-minute odor identification test: reliability, normative data, and investigations in patients with olfactory loss. *Ann Otol Rhinol Laryngol.* 2001 Oct;110(10):976-81.

5. Zhang MY, Katzman R, Salmon D, Jin H, Cai GJ, Wang ZY, Qu GY, Grant I, Yu E, Levy P, et al. The prevalence of dementia and Alzheimer's disease in Shanghai, China: impact of age, gender, and education. *Ann Neurol*. 1990 Apr;27(4):428-37.
6. Guo Q, Zhao Q, Chen M, Ding D, Hong Z. A comparison study of mild cognitive impairment with 3 memory tests among Chinese individuals. *Alzheimer Dis Assoc Disord*. 2009 Jul-Sep;23(3):253-9.
7. LU Junchao, GUO Qi-hao, HONG Zhen, SHI Weixiong, LV Chuanzhen. Trail Making Test Used by Chinese Elderly Patients with Mild Cognitive Impairment and Mild Alzheimer' Dementia. *CHINESE JOURNAL OF CLINICAL PSYCHOLOGY*. 2006, 14(2): 118-120.

**Supplementary Table 5.** Clinical features of the patients carrying pathogenic/likely pathogenic variants in causative genes of other diseases initially diagnosed as PD

| Clinical features                                       | f-LO-018                | EO-040                         | EO-055               | EO-058                                               | EO-135                         | EO-109               | f-LO-002                                             | EO-174                       | EO-110                                               | f-LO-004                                             |
|---------------------------------------------------------|-------------------------|--------------------------------|----------------------|------------------------------------------------------|--------------------------------|----------------------|------------------------------------------------------|------------------------------|------------------------------------------------------|------------------------------------------------------|
| Variants                                                | <i>DCTN1</i>            | <i>GCH1</i>                    | <i>GCH1</i>          | <i>GBA</i>                                           | <i>MAPT</i>                    | <i>MAPT</i>          | <i>PSEN1</i>                                         | <i>TH</i>                    | <i>ATXN2</i>                                         | <i>ATXN2</i>                                         |
|                                                         | p.Tyr78His              | p.Phe104Leu                    | p.Ser80Asn           | p.Phe76Val                                           | p.Asn279Lys                    | p.Asn279Lys          | p.Leu282Arg                                          | p.Arg233His                  | 22/37                                                | 20/36                                                |
|                                                         | het                     | het                            | het                  | homo                                                 | het                            | het                  | het                                                  | homo                         |                                                      |                                                      |
| Family history                                          | AR                      | Negative                       | Negative             | Consanguineous marriage                              | AD                             | AD                   | AD                                                   | Negative                     | AD                                                   | AD                                                   |
| AAO, years                                              | 50                      | 46                             | 49                   | 32                                                   | 44                             | 48                   | 50                                                   | 22                           | 35                                                   | 52                                                   |
| Disease duration at 1 <sup>st</sup> examination, months | 36                      | 10                             | 28                   | 79                                                   | 6                              | 29                   | 62                                                   | 96                           | 71                                                   | 60                                                   |
| Motor symptoms                                          | Tremor, bradykinesia    | Tremor, bradykinesia, rigidity | Tremor, bradykinesia | Tremor, bradykinesia, rigidity, postural instability | Tremor, bradykinesia, rigidity | Tremor, bradykinesia | Tremor, bradykinesia, rigidity, postural instability | Bradykinesia, rigidity       | Tremor, bradykinesia, rigidity, postural instability | Tremor, bradykinesia, rigidity, postural instability |
| Motor complications                                     | Fluctuation, dyskinesia | -                              | -                    | Fluctuation, dyskinesia, freezing gait               | -                              | Fluctuation          | Fluctuation                                          | -                            | Fluctuation                                          | -                                                    |
| Other features                                          | -                       | Sleep benefit                  | Sleep benefit        | Low Gcase level (Normal range 6.56-55.1).            | Normal eye movement            | Normal eye movement  | Urinary incontinence, cognitive impairment, visual   | Sleep benefit, foot dystonia | RBD, sleep benefit                                   | RBD, depression                                      |

|                                 |                              |                                                                      |                                           |                                                          |                                                       |                                                  |                                               |                                                                             |                                                                                                                |                                                                                           |  |  |
|---------------------------------|------------------------------|----------------------------------------------------------------------|-------------------------------------------|----------------------------------------------------------|-------------------------------------------------------|--------------------------------------------------|-----------------------------------------------|-----------------------------------------------------------------------------|----------------------------------------------------------------------------------------------------------------|-------------------------------------------------------------------------------------------|--|--|
|                                 |                              |                                                                      |                                           |                                                          |                                                       |                                                  |                                               |                                                                             | hallucination,<br>compulsive<br>behavior.<br>Medical history<br>of stroke and<br>epilepsy.                     |                                                                                           |  |  |
| UPDRS-part III, score (Med off) | 31 (Med-on)                  | 11                                                                   | 9                                         | 34                                                       | 28                                                    | 35                                               | 72 (Med-on)                                   | NA                                                                          | 8                                                                                                              | 27                                                                                        |  |  |
| H&Y stage                       | 3                            | 1                                                                    | 1                                         | 3                                                        | 2                                                     | 1.5                                              | 5                                             | 1                                                                           | 3                                                                                                              | 3                                                                                         |  |  |
| MMSE                            | 28                           | 27                                                                   | 27                                        | 24                                                       | 28                                                    | 30                                               | 5                                             | 28                                                                          | 27                                                                                                             | 29                                                                                        |  |  |
| Cerebral MRI at baseline        | Mild atrophy in frontal lobe | Unremarkable                                                         | Unremarkable                              | Unremarkable                                             | Mild atrophy in frontotemporal lobe                   | Mild atrophy in frontotemporal lobe              | Hemorrhage lesion in the right occipital lobe | Unremarkable                                                                | Unremarkable                                                                                                   | Unremarkable                                                                              |  |  |
| CFT PET/CT                      | Decreased                    | NA                                                                   | NA                                        | NA                                                       | Decreased                                             | Decreased                                        | NA                                            | NA                                                                          | NA                                                                                                             | Decreased                                                                                 |  |  |
| Follow-up                       | NA                           | 3 years after onset, symptoms were stable (followed up by telephone) | 4 years after onset, symptoms were stable | 10 years after onset, typical PD symptoms were observed. | 4 years after onset, PSP-like symptoms were observed. | 3 years after onset, FTD symptoms were observed. | NA                                            | 10 years after onset, the symptoms progressed, but no new symptoms occurred | 12 years after onset, the symptoms progressed, freezing gait and dyskinesia occurred, without signs of ataxia. | 12 years after onset, the symptoms progressed, dyskinesia and blepharospasm was observed. |  |  |



| Clinical features                                             | EO-117                                               | EO-120                                                           | EO-197                                                   | f-LO-005                                                                          | EO-129                    | EO-115                  | EO-196                                                                         | EO-127                                               | EO-134                                                | EO-121                                                           |
|---------------------------------------------------------------|------------------------------------------------------|------------------------------------------------------------------|----------------------------------------------------------|-----------------------------------------------------------------------------------|---------------------------|-------------------------|--------------------------------------------------------------------------------|------------------------------------------------------|-------------------------------------------------------|------------------------------------------------------------------|
| Variants                                                      | ATXN2<br>22/36                                       | ATXN2<br>22/36                                                   | ATXN2<br>19/35                                           | ATXN2<br>22/35                                                                    | ATXN2<br>22/37            | ATXN3<br>27/72          | ATXN3<br>14/63                                                                 | ATXN3<br>14/70                                       | ATXN3<br>16/63                                        | ATXN3<br>14/67                                                   |
| Family history                                                | AD                                                   | AD                                                               | AD                                                       | AD                                                                                | AD                        | AD                      | AD                                                                             | AD                                                   | AD                                                    | AD                                                               |
| AAO range, years                                              | 46                                                   | 33                                                               | 44                                                       | 55                                                                                | 32                        | 28                      | 41                                                                             | 36                                                   | 41                                                    | 35                                                               |
| Disease duration<br>at 1 <sup>st</sup> examination,<br>months | 85                                                   | 57                                                               | 13                                                       | 98                                                                                | 13                        | 9                       | 149                                                                            | 20                                                   | 54                                                    | 85                                                               |
| Motor symptoms                                                | Tremor,<br>bradykinesia<br>, postural<br>instability | Tremor,<br>bradykinesia,<br>rigidity,<br>postural<br>instability | Rigidity, foot<br>dystonia                               | Tremor,<br>bradykinesia,<br>rigidity,<br>postural<br>instability                  | Bradykinesia,<br>rigidity | Tremor,<br>bradykinesia | Tremor,<br>bradykinesia,<br>rigidity,<br>postural<br>instability               | Tremor,<br>bradykinesia<br>, postural<br>instability | Bradykinesia,<br>rigidity,<br>postural<br>instability | Tremor,<br>bradykinesia,<br>rigidity,<br>postural<br>instability |
| Motor<br>complications                                        | Fluctuation                                          | Freezing<br>of<br>gait                                           | Freezing<br>of<br>gait                                   | -                                                                                 | -                         | -                       | Fluctuation,<br>freezing of gait                                               | -                                                    | Fluctuation                                           | Fluctuation                                                      |
| Other features                                                | Sleep<br>benefit,<br>RBD,<br>constipation            | None                                                             | Sleep<br>benefit,<br>RBD,<br>constipation,<br>depression | Sleep benefit,<br>RBD,<br>constipation,<br>depression,<br>olfactory<br>impairment | Sleep benefit             | Sleep benefit,<br>RBD   | Olfactory<br>impairment,<br>depression,<br>sexual<br>dysfunction,<br>dementia, | Sleep benefit                                        | Sleep benefit,<br>depression                          | Sleep benefit                                                    |

|                                 |                                                                                                           |                                                                                                                                                     |              |                                                                           |              |                                                                         |              |                          |              |              |              |              |
|---------------------------------|-----------------------------------------------------------------------------------------------------------|-----------------------------------------------------------------------------------------------------------------------------------------------------|--------------|---------------------------------------------------------------------------|--------------|-------------------------------------------------------------------------|--------------|--------------------------|--------------|--------------|--------------|--------------|
|                                 |                                                                                                           |                                                                                                                                                     |              |                                                                           |              |                                                                         |              | peripheral<br>neuropathy |              |              |              |              |
| UPDRS-part III, score (Med off) | 35                                                                                                        | 18                                                                                                                                                  | 12           | 27                                                                        | 11           | 23                                                                      | NA           | 5                        | 52           | NA           |              |              |
| H&Y stage                       | 3                                                                                                         | 4                                                                                                                                                   | 2            | 3                                                                         | 2            | 2                                                                       | 3            | 1                        | 5            | 3            |              |              |
| MMSE                            | 12                                                                                                        | 28                                                                                                                                                  | 28           | 29                                                                        | 30           | 30                                                                      | NA           | 28                       | 22           | NA           |              |              |
| Cerebral MRI at baseline        | Unremarkable                                                                                              | Unremarkable                                                                                                                                        | Unremarkable | Unremarkable                                                              | Unremarkable | Unremarkable                                                            | Unremarkable | Unremarkable             | Unremarkable | Unremarkable | Unremarkable | Unremarkable |
| CFT PET/CT                      | Decreased                                                                                                 | Decreased                                                                                                                                           | NA           | NA                                                                        | NA           | Decreased                                                               | NA           | Decreased                | Decreased    | NA           |              |              |
| Follow-up                       | 15 years after onset, the symptoms progressed. Frequent falling occurred and mild nystagmus was observed. | 13 years after onset, the symptoms progressed. Fluctuation, dyskinesia, postural instability, and spastic torticollis/upper limb dystonia occurred. | NA           | 14 years after onset, the symptoms progressed. Frequent falling occurred. | NA           | 4 years after onset, the symptoms progressed. No new symptoms occurred. | NA           | NA                       | NA           | NA           | NA           | NA           |

**Abbreviations:** AAO: age at onset; AD: autosomal dominant inherited mode; AR: autosomal recessive inherited mode; CFT PET/CT: [<sup>11</sup>C]-2b-carbomethoxy-3b-(4-fluorophenyltropane) positron emission computed tomography; FTD, frontotemporal dementia; H&Y: Hoehn and Yahr; LEDD: levodopa equivalent dose daily; MMSE: Mini Mental State Examination; NA: not available; PD, Parkinson's disease; PSP, progressive supranuclear palsy; RBD, rapid eye movement sleep behavior disorder; UPDRS: Unified Parkinson's Disease Rating Scale; -: absent.

**Supplementary Table 6.** The targeted 116 movement disorder related genes in the study

| Gene symbol    | Gene name                                                                 | Mode of inheritance | Subtype or disease                                              | OMIM   | Location        |
|----------------|---------------------------------------------------------------------------|---------------------|-----------------------------------------------------------------|--------|-----------------|
| <i>ADCY5</i>   | Adenylate Cyclase 5                                                       | AD                  | ADCY5 Dyskinesia                                                | 600293 | 3q21.1          |
| <i>AFG3L2</i>  | Afg3-Like Matrix AAA Peptidase, Subunit 2                                 | AD                  | SCA28                                                           | 604581 | 18p11.21        |
| <i>ANO10</i>   | Anoctamin 10                                                              | AR                  | Spinocerebellar ataxia, autosomal recessive 10                  | 613726 | 3p22.1-p21.33   |
| <i>ANO3</i>    | Anoctamin 3                                                               | AD                  | DYT 24                                                          | 610110 | 11p14.3-p14.2   |
| <i>APTX</i>    | Aprataxin                                                                 | AR                  | Ataxia with Oculomotor Apraxia Type 1                           | 606350 | 9p21.1          |
| <i>ATM</i>     | Atm Serine/Threonine Kinase                                               | AR                  | Ataxia-telangiectasia                                           | 607585 | 11q22.3         |
| <i>ATP13A2</i> | Atpase 13A2                                                               | AR                  | PARK9                                                           | 610513 | 1p36.13         |
| <i>ATP1A3</i>  | Atpase, Na <sup>+</sup> /K <sup>+</sup> TRANSPORTING, ALPHA-3 POLYPEPTIDE | AD                  | DYT 12                                                          | 182350 | 19q13.2         |
| <i>ATP6AP2</i> | Atpase, H <sup>+</sup> TRANSPORTING, LYSOSOMAL, ACCESSORY PROTEIN 2       | XLR                 | X linked intellectual disability with epilepsy and parkinsonism | 300556 | Xp11.4          |
| <i>ATP7B</i>   | Atpase, Cu(2 <sup>+</sup> )-Transporting, Beta Polypeptide                | AR                  | Wilson's disease                                                | 606882 | 13q14.3         |
| <i>CACNA1A</i> | Calcium Channel, Voltage-Dependent, P/Q Type, Alpha-1a Subunit            | AD                  | episodic ataxia 2/SCA6                                          | 601011 | 19p13.13        |
| <i>CACNA1G</i> | Calcium Channel, Voltage-Dependent, T Type, Alpha-1g Subunit              | AD                  | SCA42                                                           | 604065 | 17q21.33        |
| <i>CACNB4</i>  | Calcium Channel, Voltage-Dependent, Beta-4 Subunit                        | AD                  | episodic ataxia 5                                               | 601949 | 2q23.3          |
| <i>CASK</i>    | Calcium/Calmodulin-Dependent Serine Protein Kinase                        | XLD                 | CASK related disorder                                           | 300172 | Xp11.4          |
| <i>CCDC88C</i> | Coiled-Coil Domain-Containing Protein 88c                                 | AD                  | SCA40                                                           | 611204 | 14q32.11-q32.12 |

|                |                                                                 |         |                                                                             |        |            |
|----------------|-----------------------------------------------------------------|---------|-----------------------------------------------------------------------------|--------|------------|
| <i>CHCHD2</i>  | Coiled-Coil-Helix-Coiled-Coil-Helix Domain-Containing Protein 2 | AD      | PARK22                                                                      | 616244 | 7p11.2     |
| <i>CHMP2B</i>  | Charged Multivesicular Body Protein 2b                          | AD      | FTD-ALS                                                                     | 609512 | 3p11.2     |
| <i>CIZ1</i>    | Cdkn1a-Interacting Zinc Finger Protein 1                        | AD      | DYT 23                                                                      | 611420 | 9q34.11    |
| <i>COASY</i>   | Coenzyme A Synthase                                             | AR      | Neurodegeneration with brain iron accumulation 6                            | 609855 | 17q21.2    |
| <i>COL6A3</i>  | Collagen, Type Vi, Alpha-3                                      | AR      | DYT 27                                                                      | 120250 | 2q37.3     |
| <i>COQ2</i>    | Coenzyme Q2, Polyprenyltransferase                              | AD, AR  | Primary Coenzyme Q10 Deficiency; Multiple system atrophy, susceptibility to | 609825 | 4q21.23    |
| <i>CP</i>      | Ceruloplasmin                                                   | AR      | Hypoceruloplasminemia                                                       | 117700 | 3q24-q25.1 |
| <i>CYP27A1</i> | Cytochrome P450, Subfamily Xxviiia, Polypeptide 1               | AR      | Cerebrotendinous Xanthomatosis                                              | 606530 | 2q35       |
| <i>DCTN1</i>   | Dynactin 1                                                      | AD      | Perry syndrome                                                              | 601143 | 2p13.1     |
| <i>DNAJC13</i> | Dnaj/Hsp40 Homolog, Subfamily C, Member 13                      | AD      | PARK21                                                                      | 614334 | 3q22.1     |
| <i>DNAJC6</i>  | Dnaj/Hsp40 Homolog, Subfamily C, Member 6                       | AR      | PARK19                                                                      | 608375 | 1p31.3     |
| <i>DNMT1</i>   | Dna Methyltransferase 1                                         | AD      | Autosomal dominant cerebellar ataxia, deafness, and narcolepsy              | 126375 | 19p13.2    |
| <i>DRD2</i>    | Dopamine Receptor D2                                            | AD?/AR? | myoclonus dystonia syndrome ?                                               | 126450 | 11q23.2    |
| <i>DRD3</i>    | Dopamine Receptor D3                                            | AD      | Essential tremor 1                                                          | 126451 | 3q13.31    |
| <i>EIF4G1</i>  | Eukaryotic Translation Initiation Factor 4-Gamma, 1             | AD      | PARK18                                                                      | 600495 | 3q27.1     |
| <i>ELOVL4</i>  | Elongation Of Very Long Chain Fatty Acids-Like 4                | AD      | SCA34                                                                       | 605512 | 6q14.1     |
| <i>ELOVL5</i>  | Elongation Of Very Long Chain Fatty Acids-Like 5                | AD      | SCA38                                                                       | 611805 | 6p12.1     |
| <i>FA2H</i>    | Fatty Acid 2-Hydroxylase                                        | AR      | Spastic paraplegia 35                                                       | 611026 | 16q23.1    |
| <i>FBXO7</i>   | F-Box Only Protein 7                                            | AR      | PARK15                                                                      | 605648 | 22q12.3    |

|               |                                                                      |    |                                                      |        |                  |
|---------------|----------------------------------------------------------------------|----|------------------------------------------------------|--------|------------------|
| <i>FGF14</i>  | Fibroblast Growth Factor 14                                          | AD | SCA27                                                | 601515 | 13q33.1          |
| <i>FTL</i>    | Ferritin Light Chain                                                 | AD | Neuroferritinopathy                                  | 134790 | 19q13.33         |
| <i>FUS</i>    | Fused In Sarcoma                                                     | AD | essential tremor 4, FTD-ALS                          | 137070 | 16p11.2          |
| <i>FXN</i>    | Frataxin                                                             | AR | Friedreich Ataxia                                    | 606829 | 9q21.11          |
| <i>GBA</i>    | Glucosidase, Beta, Acid                                              | AR | Gaucher's disease                                    | 606463 | 1q22             |
| <i>GCH1</i>   | Gtp Cyclohydrolase I                                                 | AD | DYT 5a/14                                            | 600225 | 14q22.2          |
| <i>GIGYF2</i> | Grb10-Interacting Gyf Protein 2                                      | AD | PARK11                                               | 612003 | 2q37.1           |
| <i>GNAL</i>   | Guanine Nucleotide-Binding Protein                                   | AD | DYT 25                                               | 139312 | 18p11.21         |
| <i>GRID2</i>  | Glutamate Receptor, Ionotropic, Delta 2                              | AR | <i>GRID2</i> -related spinocerebellar ataxia         | 602368 | 4q22.1-<br>q22.2 |
| <i>GRN</i>    | Frontotemporal Lobar Degeneration With Tdp43 Inclusions              | AD | FTD                                                  | 607485 | 17q21.31         |
| <i>HPCA</i>   | Hippocalcin                                                          | AR | DYT 2                                                | 142622 | 1p35.1           |
| <i>HTRA2</i>  | Htra Serine Peptidase 2                                              | AD | PARK13                                               | 606441 | 2p13.1           |
| <i>IFRD1</i>  | Interferon-Related Developmental Regulator 1                         | AD | SCA18                                                | 603502 | 7q31.1           |
| <i>ISG15</i>  | Ubiquitin-Like Modifier                                              | AR | Immunodeficiency 38 with basal ganglia calcification | 147571 | 1p36.33          |
| <i>ITPR1</i>  | Inositol 1,4,5-Triphosphate Receptor, Type 1                         | AD | SCA15/29                                             | 147265 | 3p26.1           |
| <i>KCNA1</i>  | Potassium Channel, Voltage-Gated, Shaker-Related Subfamily, Member 1 | AD | episodic ataxia 1                                    | 176260 | 12p13.32         |
| <i>KCND3</i>  | Potassium Voltage-Gated Channel, Shal-Related Subfamily, Member 3    | AD | SCA19                                                | 605411 | 1p13.2           |
| <i>KCTD17</i> | Potassium Channel Tetramerization Domain-Containing Protein 17       | AD | DYT 26                                               | 616386 | 22q12.3          |
| <i>LRRK2</i>  | Leucine-Rich Repeat Kinase 2                                         | AD | PARK8                                                | 609007 | 12q12            |
| <i>MAPT</i>   | Microtubule-Associated Protein Tau                                   | AD | FTD/CBS/PSP                                          | 157140 | 17q21.31         |

|                                 |                                                                              |     |                                                   |        |          |
|---------------------------------|------------------------------------------------------------------------------|-----|---------------------------------------------------|--------|----------|
| <i>MCCC1</i>                    | 3-METHYLCROTONYL-Coa CARBOXYLASE 1                                           | AR  | 3-Methylcrotonyl-CoA carboxylase 1 deficiency     | 609010 | 3q27.1   |
| <i>MECP2</i>                    | METHYL-Cpg-BINDING PROTEIN 2                                                 | XLD | Rett syndrome                                     | 300005 | Xq28     |
| <i>MR1</i>                      | Major Histocompatibility Complex, Class I-Related                            | AD  | DYT 8                                             | 600764 | 1q25.3   |
| <i>NKX2-1</i>                   | Nk2 Homeobox 1                                                               | AD  | hereditary benign chorea                          | 600635 | 14q13.3  |
| <i>PANK2</i>                    | Pantothenate Kinase 2                                                        | AR  | neurodegeneration with brain iron accumulation 1  | 606157 | 20p13    |
| <i>PARK2</i><br>( <i>PRKN</i> ) | Parkinson Disease 2                                                          | AR  | PARK2                                             | 600116 | 6q26     |
| <i>PARK7</i> ( <i>DJ-1</i> )    | Parkinson Disease 7                                                          | AR  | PARK7                                             | 602533 | 1p36.23  |
| <i>PDGFB</i>                    | Platelet-Derived Growth Factor, Beta Polypeptide                             | AD  | Idiopathic basal ganglia calcification 5          | 190040 | 22q13.1  |
| <i>PDGFRB</i>                   | Platelet-Derived Growth Factor Receptor, Beta                                | AD  | Idiopathic basal ganglia calcification 4          | 173410 | 5q32     |
| <i>PDYN</i>                     | Prodynorphin                                                                 | AD  | SCA23                                             | 131340 | 20p13    |
| <i>PEX7</i>                     | Peroxisome Biogenesis Factor 7                                               | AR  | Refsum disease                                    | 601757 | 6q23.3   |
| <i>PHYH</i>                     | PHYTANOYL-Coa HYDROXYLASE                                                    | AR  | Refsum disease                                    | 602026 | 10p13    |
| <i>PINK1</i>                    | Pten-Induced Kinase 1                                                        | AR  | PARK6                                             | 608309 | 1p36.12  |
| <i>PLA2G6</i>                   | Phospholipase A2, Group Vi                                                   | AR  | PARK14                                            | 603604 | 22q13.1  |
| <i>PNKD</i>                     | Pnkd Metallo-Beta-Lactamase Domain-Containing Protein                        | AD  | DYT 8                                             | 609023 | 2q35     |
| <i>PNPLA6</i>                   | Patatin-Like Phospholipase Domain-Containing Protein 6                       | AR  | spastic paraplegia 39, Boucher-Neuhauser syndrome | 603197 | 19p13.2  |
| <i>POLG</i>                     | Polymerase, Dna, Gamma                                                       | AR  | POLG-Related Disorders                            | 174763 | 15q26.1  |
| <i>PRKCG</i>                    | Protein Kinase C, Gamma                                                      | AD  | SCA14                                             | 176980 | 19q13.42 |
| <i>PRKRA</i>                    | Protein Kinase, Interferon-Inducible Double-Stranded Rna-Dependent Activator | AR  | DYT 16                                            | 603424 | 2q31.2   |

|                 |                                                                               |     |                                                                 |        |          |
|-----------------|-------------------------------------------------------------------------------|-----|-----------------------------------------------------------------|--------|----------|
| <i>PRNP</i>     | Prion Protein                                                                 | AD  | Huntington disease-like 1                                       | 176640 | 20p13    |
| <i>PRRT2</i>    | Proline-Rich Transmembrane Protein 2                                          | AD  | DYT 10, episodic kinesigenic dyskinesia 1                       | 614386 | 16p11.2  |
| <i>PSEN1</i>    | Presenilin 1                                                                  | AD  | Alzheimer's disease                                             | 104311 | 14q24.2  |
| <i>RAB39B</i>   | Rab39b, Member Ras Oncogene Family                                            | XLD | Waisman Syndrome                                                | 300774 | Xq28     |
| <i>SACS</i>     | Sacsin                                                                        | AR  | Autosomal Recessive Spastic Ataxia of Charlevoix-Saguenay       | 604490 | 13q12.12 |
| <i>SCARB2</i>   | Scavenger Receptor Class B, Member 2                                          | AR  | Action Myoclonus Renal Failure Syndrome                         | 602257 | 4q21.1   |
| <i>SCN2A</i>    | Sodium Voltage-Gated Channel, Alpha Subunit 2                                 | AD  | episodic ataxia 9                                               | 182390 | 2q24.3   |
| <i>SCN4A</i>    | Sodium Voltage-Gated Channel, Alpha Subunit 4;                                | AD  | Myotonia congenita                                              | 603967 | 17q23.3  |
| <i>SETX</i>     | Senataxin                                                                     | AR  | Ataxia with Oculomotor Apraxia Type 2                           | 608465 | 9q34.13  |
| <i>SGCE</i>     | Sarcoglycan, Epsilon                                                          | AD  | DYT 11                                                          | 604149 | 7q21.3   |
| <i>SIL1</i>     | Sil1 Nucleotide Exchange Factor                                               | AR  | Marinesco-Sjogren syndrome                                      | 608005 | 5q31.2   |
| <i>SLC1A3</i>   | Solute Carrier Family 1 (Glial High Affinity Glutamate Transporter), Member 3 | AD  | Episodic ataxia 6                                               | 600111 | 5p13.2   |
| <i>SLC20A2</i>  | Solute Carrier Family 20 (Phosphate Transporter), Member 2                    | AD  | Idiopathic basal ganglia calcification 1                        | 158378 | 8p11.21  |
| <i>SLC2A1</i>   | Solute Carrier Family 2 (Facilitated Glucose Transporter), Member 1           | AD  | DYT 9                                                           | 138140 | 1p34.2   |
| <i>SLC39A14</i> | Solute Carrier Family 39 (Zinc Transporter), Member 14                        | AR  | Hypermanganesemia with dystonia 2                               | 608736 | 8p21.3   |
| <i>SLC6A3</i>   | Solute Carrier Family 6 (Neurotransmitter Transporter, Dopamine), Member 3    | AR  | <i>SLC6A3</i> -Related Dopamine Transporter Deficiency Syndrome | 126455 | 5p15.33  |
| <i>SNCA</i>     | Synuclein, Alpha                                                              | AD  | PARK1/4                                                         | 163890 | 4q22.1   |



|                |                                                                          |    |                                                |        |             |
|----------------|--------------------------------------------------------------------------|----|------------------------------------------------|--------|-------------|
| <i>SNX14</i>   | Sorting Nexin 14                                                         | AR | Spinocerebellar ataxia, autosomal recessive 20 | 616105 | 6q14.3      |
| <i>SPR</i>     | Sepiapterin Reductase                                                    | AR | Sepiapterin reductase deficiency               | 182125 | 2p13.2      |
| <i>SPTBN2</i>  | Spectrin, Beta, Nonerythrocytic, 2                                       | AD | SCA5                                           | 604985 | 11q13.2     |
| <i>SQSTM1</i>  | Sequestosome 1                                                           | AD | FTD-ALS                                        | 601530 | 5q35.3      |
| <i>SYNJ1</i>   | Synaptojanin 1                                                           | AR | PARK20                                         | 604297 | 21q22.11    |
| <i>TARDBP</i>  | Amyotrophic Lateral Sclerosis 10 With Or Without Frontotemporal Dementia | AD | FTD-ALS                                        | 612069 | 1p36.22     |
| <i>TBK1</i>    | Tank-Binding Kinase 1                                                    | AD | FTD-ALS                                        | 604834 | 12q14.2     |
| <i>TENM4</i>   | Teneurin Transmembrane Protein 4                                         | AD | Essential tremor 5                             | 610084 | 11q14.1     |
| <i>TGM6</i>    | Transglutaminase 6                                                       | AD | SCA35                                          | 613900 | 20p13       |
| <i>TH</i>      | Tyrosine Hydroxylase                                                     | AR | DYT 5b                                         | 191290 | 11p15.5     |
| <i>THAP1</i>   | Thap Domain-Containing Protein 1                                         | AD | DYT 6                                          | 609520 | 8p11.21     |
| <i>TMEM230</i> | Transmembrane Protein 230                                                | AD | PARK21                                         | 617019 | 20p13-p12.3 |
| <i>TMEM240</i> | Transmembrane Protein 240                                                | AD | SCA21                                          | 616101 | 1p36.33     |
| <i>TOR1A</i>   | Torsin 1a                                                                | AD | DYT 1                                          | 605204 | 9q34.11     |
| <i>TTBK2</i>   | Tau Tubulin Kinase 2                                                     | AD | SCA11                                          | 611695 | 15q15.2     |
| <i>TTPA</i>    | Tocopherol Transfer Protein, Alpha                                       | AR | Ataxia with isolated vitamin E deficiency      | 600415 | 8q12.3      |
| <i>TUBB4A</i>  | Tubulin, Beta-4a                                                         | AD | DYT 4                                          | 602662 | 19p13.3     |
| <i>UBQLN2</i>  | Ubiquilin 2                                                              | AD | FTD-ALS                                        | 300264 | Xp11.21     |
| <i>UCHL1</i>   | Ubiquitin Carboxyl-Terminal Esterase L1                                  | AR | PARK5                                          | 191342 | 4p13        |
| <i>VCP</i>     | Valosin-Containing Protein                                               | AD | FTD-ALS                                        | 601023 | 9p13.3      |
| <i>VPS13A</i>  | Vacuolar Protein Sorting 13 Homolog A                                    | AR | Choreoacanthocytosis                           | 605978 | 9q21.2      |
| <i>VPS13C</i>  | Vacuolar Protein Sorting 13 Homolog C                                    | AR | PARK23                                         | 608879 | 15q22.2     |

|              |                                                      |     |                                                  |        |         |
|--------------|------------------------------------------------------|-----|--------------------------------------------------|--------|---------|
| <i>VPS35</i> | Vps35 Retromer Complex Component                     | AD  | PARK17                                           | 601501 | 16q11.2 |
| <i>WDR45</i> | Wd Repeat-Containing Protein 45                      | XLD | Neurodegeneration with brain iron accumulation 5 | 300526 | Xp11.23 |
| <i>XK</i>    | Kell Blood Group Protein, Mcleod Syndrome-Associated | XLR | McLeod syndrome                                  | 314850 | Xp21.1  |
| <i>XPR1</i>  | Xenotropic And Polytropic Retrovirus Receptor        | AD  | idiopathic basal ganglia calcification 6         | 605237 | 1q25.3  |

---

Abbreviations: AD: autosomal dominant inherited mode; AR: autosomal recessive inherited mode; CBS: corticobasal syndrome; FTD-ALS: frontotemporal dementia-amyotrophic lateral sclerosis; PSP: progressive supranuclear palsy; SCA: spinocerebellar ataxia; XLD: X-linked dominant inherited mode; XLR: X-linked recessive inherited mode

**Supplementary Table 7.** The regions with sequencing depth below 20x in the target sequencing and whole exome sequencing

| Chromosome                       | Name            | Start     | End       | %GC    | Mean depth (x) |
|----------------------------------|-----------------|-----------|-----------|--------|----------------|
| Sequencing of 116 targeted genes |                 |           |           |        |                |
| chr1                             | <i>TMEM240</i>  | 1475832   | 1475952   | 83.47% | 0.394737       |
| chr1                             | <i>ATP13A2</i>  | 17338145  | 17338325  | 80.11% | 16.42105       |
| chr1                             | <i>ATP13A2</i>  | 17338327  | 17338567  | 79.67% | 18.86842       |
| chr1                             | <i>HPCA</i>     | 33351985  | 33352165  | 79.01% | 11.44737       |
| chr11                            | <i>DRD2</i>     | 113345774 | 113346014 | 78.84% | 5              |
| chr14                            | <i>CCDC88C</i>  | 91884077  | 91884257  | 80.11% | 19.53947       |
| chr19                            | <i>DNMT1</i>    | 10341830  | 10342010  | 76.24% | 8.947368       |
| chr19                            | <i>CACNA1A</i>  | 13617144  | 13617264  | 78.51% | 19.15789       |
| chr3                             | <i>ANO10</i>    | 43663249  | 43663489  | 76.35% | 11.61842       |
| chr5                             | <i>SLC6A3</i>   | 1445413   | 1445593   | 73.48% | 16.30263       |
| chr8                             | <i>SLC39A14</i> | 22224721  | 22224961  | 79.67% | 15.89474       |
| chr9                             | <i>SETX</i>     | 135230247 | 135230427 | 74.59% | 10.31579       |
| chrX                             | <i>CASK</i>     | 41782492  | 41782732  | 79.67% | 3.815789       |
| Whole exome sequencing           |                 |           |           |        |                |
| chr3                             | <i>ADCY5</i>    | 123001142 | 123003583 | 52.50% | 11.29          |
| chr18                            | <i>AFG3L2</i>   | 12359925  | 12360050  | 43.65% | 14.44          |
| chr18                            | <i>AFG3L2</i>   | 12376967  | 12377275  | 79.29% | 9.59           |
| chr11                            | <i>ANO3</i>     | 26210669  | 26210877  | 37.80% | 0.44           |
| chr11                            | <i>ANO3</i>     | 26331191  | 26331266  | 44.74% | 0              |
| chr11                            | <i>ANO3</i>     | 26495448  | 26495675  | 39.04% | 0.2            |
| chr11                            | <i>ANO3</i>     | 26681808  | 26684836  | 35.19% | 9.81           |
| chr3                             | <i>ANO10</i>    | 43663264  | 43663418  | 78.06% | 0.31           |
| chr3                             | <i>ANO10</i>    | 43663400  | 43663569  | 78.24% | 0.8            |
| chr3                             | <i>ANO10</i>    | 43733008  | 43733086  | 64.56% | 0.79           |
| chr9                             | <i>APTX</i>     | 32985968  | 32986028  | 52.46% | 3.17           |
| chr9                             | <i>APTX</i>     | 32997240  | 32997346  | 47.66% | 0              |
| chr9                             | <i>APTX</i>     | 33024801  | 33025118  | 63.84% | 0.09           |
| chr9                             | <i>APTX</i>     | 33024997  | 33025118  | 64.75% | 0              |
| chr9                             | <i>APTX</i>     | 33025020  | 33025118  | 63.64% | 0              |
| chr11                            | <i>ATM</i>      | 108093558 | 108093913 | 63.48% | 1.2            |
| chr11                            | <i>ATM</i>      | 108094255 | 108094413 | 49.06% | 0              |
| chr11                            | <i>ATM</i>      | 108095510 | 108095598 | 38.20% | 0              |
| chr11                            | <i>ATM</i>      | 108236051 | 108239826 | 37.82% | 6.07           |
| chrX                             | <i>ATP6AP2</i>  | 40464812  | 40465888  | 32.22% | 9.84           |
| chr17                            | <i>CACNA1G</i>  | 48638075  | 48639062  | 75.61% | 10.26          |
| chr2                             | <i>CACNB4</i>   | 152689285 | 152695893 | 31.81% | 7.29           |
| chr2                             | <i>CACNB4</i>   | 152826794 | 152826940 | 38.78% | 0              |

|       |                |           |           |        |       |
|-------|----------------|-----------|-----------|--------|-------|
| chr2  | <i>CACNB4</i>  | 152828399 | 152828566 | 55.36% | 2.29  |
| chrX  | <i>CASK</i>    | 41374188  | 41379849  | 42.02% | 3.84  |
| chr7  | <i>CHCHD2</i>  | 56169254  | 56169554  | 37.21% | 11.58 |
| chr7  | <i>CHCHD2</i>  | 56169265  | 56169554  | 37.24% | 12.01 |
| chr3  | <i>CHMP2B</i>  | 87302861  | 87304698  | 30.74% | 8.75  |
| chr3  | <i>CHMP2B</i>  | 87302861  | 87304706  | 30.72% | 8.71  |
| chr9  | <i>CIZ1</i>    | 130953710 | 130953851 | 80.28% | 0.49  |
| chr9  | <i>CIZ1</i>    | 130953710 | 130953868 | 79.87% | 0.53  |
| chr9  | <i>CIZ1</i>    | 130966464 | 130966662 | 68.84% | 0.46  |
| chr17 | <i>COASY</i>   | 40714091  | 40714237  | 57.82% | 13.03 |
| chr2  | <i>COL6A3</i>  | 238322595 | 238322850 | 52.73% | 1.69  |
| chr2  | <i>DCTN1</i>   | 74618920  | 74619214  | 68.47% | 0.26  |
| chr3  | <i>DNAJC13</i> | 132136345 | 132136604 | 71.54% | 2.79  |
| chr3  | <i>DNAJC13</i> | 132136503 | 132136604 | 70.59% | 2.47  |
| chr3  | <i>DNAJC13</i> | 132191400 | 132191415 | 31.25% | 0.45  |
| chr3  | <i>DNAJC13</i> | 132224145 | 132224259 | 30.43% | 14.1  |
| chr1  | <i>DNAJC6</i>  | 65811293  | 65811406  | 44.74% | 0     |
| chr1  | <i>DNAJC6</i>  | 65878606  | 65881552  | 35.32% | 7.04  |
| chr1  | <i>DNAJC6</i>  | 65878606  | 65881554  | 35.30% | 7.03  |
| chr11 | <i>DRD2</i>    | 113345797 | 113346001 | 79.02% | 0     |
| chr11 | <i>DRD2</i>    | 113345797 | 113346120 | 82.41% | 0     |
| chr3  | <i>DRD3</i>    | 113894772 | 113895040 | 37.92% | 0.34  |
| chr3  | <i>DRD3</i>    | 113897503 | 113897623 | 45.45% | 0.35  |
| chr3  | <i>DRD3</i>    | 113897503 | 113897899 | 45.09% | 0.12  |
| chr3  | <i>DRD3</i>    | 113918119 | 113918254 | 49.26% | 0     |
| chr3  | <i>EIF4G1</i>  | 184032282 | 184032462 | 74.59% | 0     |
| chr3  | <i>EIF4G1</i>  | 184032289 | 184032462 | 74.14% | 0     |
| chr6  | <i>ELOVL4</i>  | 80624531  | 80626600  | 32.90% | 6.76  |
| chr6  | <i>ELOVL5</i>  | 53132195  | 53134068  | 35.81% | 15.46 |
| chr6  | <i>ELOVL5</i>  | 53132201  | 53134068  | 35.71% | 15.51 |
| chr13 | <i>FGF14</i>   | 102373204 | 102375317 | 39.50% | 13.58 |
| chr13 | <i>FGF14</i>   | 102480071 | 102480272 | 29.21% | 0     |
| chr13 | <i>FGF14</i>   | 102845386 | 102845713 | 46.65% | 0.16  |
| chr13 | <i>FGF14</i>   | 102845472 | 102845713 | 48.76% | 0.13  |
| chr13 | <i>FGF14</i>   | 102858216 | 102858327 | 54.46% | 0.27  |
| chr13 | <i>FGF14</i>   | 102873046 | 102873283 | 45.38% | 0.31  |
| chr13 | <i>FGF14</i>   | 102946323 | 102946390 | 42.65% | 0     |
| chr13 | <i>FGF14</i>   | 102962820 | 102963036 | 42.40% | 0.13  |
| chr13 | <i>FGF14</i>   | 102969985 | 102970054 | 58.57% | 0.13  |
| chr13 | <i>FGF14</i>   | 103018794 | 103018963 | 52.35% | 0     |
| chr13 | <i>FGF14</i>   | 103046107 | 103046181 | 52.00% | 0.25  |
| chr13 | <i>FGF14</i>   | 103054303 | 103054382 | 47.50% | 0.12  |

|       |               |           |           |        |       |
|-------|---------------|-----------|-----------|--------|-------|
| chr13 | <i>FGF14</i>  | 103054472 | 103054778 | 50.81% | 0.27  |
| chr13 | <i>FGF14</i>  | 103054476 | 103054778 | 50.83% | 0.27  |
| chr13 | <i>FGF14</i>  | 103054485 | 103054778 | 51.02% | 0.27  |
| chr16 | <i>FUS</i>    | 31202719  | 31206192  | 45.94% | 2.5   |
| chr9  | <i>FXN</i>    | 71650478  | 71650863  | 67.62% | 15.51 |
| chr9  | <i>FXN</i>    | 71687527  | 71693992  | 43.49% | 5.67  |
| chr9  | <i>FXN</i>    | 71687527  | 71693993  | 43.50% | 5.67  |
| chr1  | <i>GBA</i>    | 155214296 | 155214653 | 62.57% | 0.22  |
| chr2  | <i>GIGYF2</i> | 233562014 | 233562102 | 62.92% | 1.41  |
| chr2  | <i>GIGYF2</i> | 233565294 | 233565364 | 43.66% | 0     |
| chr2  | <i>GIGYF2</i> | 233568133 | 233568199 | 41.79% | 0     |
| chr2  | <i>GIGYF2</i> | 233589283 | 233589401 | 56.30% | 0.65  |
| chr2  | <i>GIGYF2</i> | 233595831 | 233595944 | 42.98% | 0     |
| chr2  | <i>GIGYF2</i> | 233599126 | 233599196 | 57.75% | 0.25  |
| chr2  | <i>GIGYF2</i> | 233600472 | 233601358 | 31.23% | 0.33  |
| chr2  | <i>GIGYF2</i> | 233721502 | 233725287 | 43.03% | 10.62 |
| chr18 | <i>GNAL</i>   | 11751470  | 11751507  | 50.00% | 0.09  |
| chr18 | <i>GNAL</i>   | 11751470  | 11751705  | 68.22% | 0.53  |
| chr18 | <i>GNAL</i>   | 11857436  | 11857784  | 51.86% | 0.51  |
| chr4  | <i>GRID2</i>  | 93225116  | 93225895  | 53.59% | 17.1  |
| chr17 | <i>GRN</i>    | 42422453  | 42422702  | 56.80% | 0.13  |
| chr1  | <i>HPCA</i>   | 33352091  | 33352116  | 73.08% | 0.36  |
| chr7  | <i>IFRD1</i>  | 112063198 | 112063487 | 41.72% | 0     |
| chr7  | <i>IFRD1</i>  | 112092112 | 112092566 | 45.49% | 0.62  |
| chr7  | <i>IFRD1</i>  | 112115196 | 112115290 | 56.84% | 1.47  |
| chr7  | <i>IFRD1</i>  | 112115484 | 112117258 | 36.17% | 3.01  |
| chr3  | <i>ITPR1</i>  | 4535031   | 4535289   | 63.71% | 3.22  |
| chr3  | <i>ITPR1</i>  | 4536114   | 4536190   | 59.74% | 0     |
| chr3  | <i>ITPR1</i>  | 4887822   | 4889524   | 33.41% | 6.37  |
| chr12 | <i>KCNA1</i>  | 5019070   | 5019638   | 65.73% | 0.13  |
| chr1  | <i>KCND3</i>  | 112531369 | 112531777 | 58.19% | 0.77  |
| chr22 | <i>KCTD17</i> | 37458564  | 37459430  | 62.75% | 9.62  |
| chr12 | <i>LRRK2</i>  | 40761445  | 40763086  | 29.29% | 3.44  |
| chr17 | <i>MAPT</i>   | 43971747  | 43972052  | 76.14% | 0.32  |
| chr3  | <i>MCCC1</i>  | 182746880 | 182746977 | 39.80% | 0     |
| chr3  | <i>MCCC1</i>  | 182816275 | 182817031 | 50.46% | 3.73  |
| chrX  | <i>MECP2</i>  | 153323849 | 153324017 | 55.62% | 0     |
| chr1  | <i>MR1</i>    | 181002560 | 181002600 | 39.02% | 0.75  |
| chr1  | <i>MR1</i>    | 181006132 | 181006248 | 45.30% | 0     |
| chr1  | <i>MR1</i>    | 181024360 | 181031074 | 44.24% | 5.08  |
| chr20 | <i>PANK2</i>  | 3869485   | 3869551   | 68.66% | 1.27  |
| chr20 | <i>PANK2</i>  | 3871890   | 3872058   | 53.85% | 1.32  |

|       |               |           |           |        |       |
|-------|---------------|-----------|-----------|--------|-------|
| chr20 | <i>PANK2</i>  | 3903890   | 3910529   | 50.38% | 4.09  |
| chr1  | <i>PARK7</i>  | 8021713   | 8021795   | 68.67% | 0.8   |
| chr1  | <i>PARK7</i>  | 8021770   | 8021853   | 69.05% | 0.95  |
| chr22 | <i>PDGFB</i>  | 39619363  | 39621318  | 54.50% | 0.48  |
| chr22 | <i>PDGFB</i>  | 39639905  | 39641060  | 69.46% | 9.53  |
| chr20 | <i>PDYN</i>   | 1973229   | 1973289   | 57.38% | 0.71  |
| chr20 | <i>PDYN</i>   | 1973229   | 1973452   | 54.02% | 1.44  |
| chr20 | <i>PDYN</i>   | 1974332   | 1974394   | 52.38% | 0     |
| chr20 | <i>PDYN</i>   | 1974556   | 1974704   | 62.42% | 0.04  |
| chr20 | <i>PDYN</i>   | 1974556   | 1974931   | 61.70% | 0.32  |
| chr10 | <i>PHYH</i>   | 13341419  | 13341746  | 67.38% | 1.13  |
| chr22 | <i>PLA2G6</i> | 38577670  | 38577837  | 61.31% | 0     |
| chr22 | <i>PLA2G6</i> | 38577790  | 38577916  | 62.20% | 0     |
| chr2  | <i>PNKD</i>   | 219209530 | 219211516 | 57.73% | 8.23  |
| chr19 | <i>PNPLA6</i> | 7599037   | 7599125   | 68.54% | 0.4   |
| chr19 | <i>PNPLA6</i> | 7599127   | 7599332   | 57.77% | 0.03  |
| chr19 | <i>PNPLA6</i> | 7599590   | 7599788   | 58.29% | 0     |
| chr19 | <i>PNPLA6</i> | 7599635   | 7599788   | 57.14% | 0     |
| chr19 | <i>PNPLA6</i> | 7600012   | 7600088   | 67.53% | 3.5   |
| chr15 | <i>POLG</i>   | 89877903  | 89878026  | 76.61% | 0.46  |
| chr15 | <i>POLG</i>   | 89877915  | 89878026  | 77.68% | 0.45  |
| chr19 | <i>PRKCG</i>  | 54410247  | 54410901  | 60.76% | 13.04 |
| chr2  | <i>PRKRA</i>  | 179315288 | 179315355 | 67.65% | 8.67  |
| chr20 | <i>PRNP</i>   | 4666739   | 4667154   | 63.70% | 0.52  |
| chr20 | <i>PRNP</i>   | 4666739   | 4667158   | 63.81% | 0.52  |
| chr20 | <i>PRNP</i>   | 4667151   | 4667382   | 78.45% | 0.82  |
| chr16 | <i>PRRT2</i>  | 29823408  | 29823644  | 74.26% | 1.23  |
| chr16 | <i>PRRT2</i>  | 29823408  | 29823672  | 73.96% | 1.18  |
| chr16 | <i>PRRT2</i>  | 29823513  | 29823644  | 70.45% | 0.78  |
| chr16 | <i>PRRT2</i>  | 29825653  | 29827202  | 57.29% | 13.32 |
| chr16 | <i>PRRT2</i>  | 29825948  | 29827202  | 55.94% | 5.04  |
| chr14 | <i>PSEN1</i>  | 73603142  | 73603291  | 66.00% | 0.35  |
| chr14 | <i>PSEN1</i>  | 73603214  | 73603291  | 66.67% | 0.13  |
| chr14 | <i>PSEN1</i>  | 73685841  | 73690399  | 41.96% | 3.47  |
| chr13 | <i>SACS</i>   | 24007753  | 24007841  | 62.92% | 0.15  |
| chr4  | <i>SCARB2</i> | 77079891  | 77082904  | 37.69% | 6.75  |
| chr2  | <i>SCN2A</i>  | 166095923 | 166096150 | 35.96% | 0     |
| chr2  | <i>SCN2A</i>  | 166150340 | 166150645 | 37.91% | 0.06  |
| chr2  | <i>SCN2A</i>  | 166153526 | 166153645 | 36.67% | 15.41 |
| chr2  | <i>SCN2A</i>  | 166237602 | 166237707 | 37.74% | 10.22 |
| chr9  | <i>SETX</i>   | 135229035 | 135229142 | 45.37% | 0.48  |
| chr9  | <i>SETX</i>   | 135230037 | 135230243 | 73.91% | 0     |

|       |                 |           |           |        |       |
|-------|-----------------|-----------|-----------|--------|-------|
| chr9  | <i>SETX</i>     | 135230303 | 135230373 | 70.42% | 0     |
| chr7  | <i>SGCE</i>     | 94227241  | 94227316  | 61.84% | 13.53 |
| chr7  | <i>SGCE</i>     | 94270208  | 94270276  | 62.32% | 0.64  |
| chr5  | <i>SIL1</i>     | 138532129 | 138532217 | 47.19% | 0     |
| chr5  | <i>SIL1</i>     | 138533957 | 138534057 | 72.28% | 0.24  |
| chr5  | <i>SIL1</i>     | 138533957 | 138534065 | 72.48% | 0.26  |
| chr5  | <i>SLC1A3</i>   | 36606456  | 36606837  | 49.21% | 0     |
| chr5  | <i>SLC1A3</i>   | 36606707  | 36606837  | 52.67% | 0     |
| chr5  | <i>SLC1A3</i>   | 36686166  | 36688436  | 39.81% | 7.42  |
| chr8  | <i>SLC20A2</i>  | 42358548  | 42358749  | 42.08% | 0.14  |
| chr8  | <i>SLC20A2</i>  | 42396594  | 42396655  | 70.97% | 0     |
| chr8  | <i>SLC20A2</i>  | 42396963  | 42397356  | 69.04% | 0     |
| chr8  | <i>SLC39A14</i> | 22224742  | 22224921  | 77.78% | 0.26  |
| chr8  | <i>SLC39A14</i> | 22224790  | 22224921  | 78.03% | 0.32  |
| chr8  | <i>SLC39A14</i> | 22225036  | 22225250  | 73.95% | 0.16  |
| chr8  | <i>SLC39A14</i> | 22236939  | 22237027  | 58.43% | 0.34  |
| chr8  | <i>SLC39A14</i> | 22248242  | 22248360  | 56.30% | 0.23  |
| chr8  | <i>SLC39A14</i> | 22250342  | 22250745  | 54.95% | 0.8   |
| chr8  | <i>SLC39A14</i> | 22250342  | 22250932  | 55.84% | 1.08  |
| chr8  | <i>SLC39A14</i> | 22250566  | 22250745  | 59.44% | 0.95  |
| chr8  | <i>SLC39A14</i> | 22277064  | 22280249  | 42.97% | 13.81 |
| chr5  | <i>SLC6A3</i>   | 1445462   | 1445555   | 76.60% | 0.41  |
| chr4  | <i>SNCA</i>     | 90645249  | 90647811  | 33.63% | 4.98  |
| chr4  | <i>SNCA</i>     | 90757893  | 90758127  | 55.32% | 0     |
| chr4  | <i>SNCA</i>     | 90758112  | 90758350  | 68.62% | 0.82  |
| chr4  | <i>SNCA</i>     | 90759402  | 90759447  | 50.00% | 0     |
| chr6  | <i>SNX14</i>    | 86217685  | 86218031  | 37.75% | 14.98 |
| chr6  | <i>SNX14</i>    | 86227725  | 86227766  | 30.95% | 3.33  |
| chr6  | <i>SNX14</i>    | 86253322  | 86253478  | 29.30% | 14.56 |
| chr6  | <i>SNX14</i>    | 86267693  | 86267778  | 33.72% | 13.29 |
| chr6  | <i>SNX14</i>    | 86277251  | 86277295  | 37.78% | 16.87 |
| chr6  | <i>SNX14</i>    | 86290913  | 86290976  | 43.75% | 0     |
| chr6  | <i>SNX14</i>    | 86303551  | 86303874  | 66.98% | 7.31  |
| chr5  | <i>SQSTM1</i>   | 179234002 | 179234123 | 78.69% | 0.36  |
| chr5  | <i>SQSTM1</i>   | 179238573 | 179238682 | 49.09% | 0.2   |
| chr21 | <i>SYNJ1</i>    | 34048641  | 34048665  | 44.00% | 13.56 |
| chr21 | <i>SYNJ1</i>    | 34100147  | 34100250  | 77.88% | 10.12 |
| chr1  | <i>TARDBP</i>   | 11072678  | 11072800  | 72.36% | 4.28  |
| chr12 | <i>TBK1</i>     | 64845899  | 64845967  | 78.26% | 0     |
| chr12 | <i>TBK1</i>     | 64890146  | 64890186  | 26.83% | 8.76  |
| chr11 | <i>TENM4</i>    | 78859754  | 78859851  | 29.59% | 0.02  |
| chr11 | <i>TENM4</i>    | 78926852  | 78926954  | 58.25% | 0.46  |

|       |                |           |           |        |       |
|-------|----------------|-----------|-----------|--------|-------|
| chr11 | <i>TENM4</i>   | 79008532  | 79008588  | 47.37% | 0     |
| chr11 | <i>TENM4</i>   | 79151552  | 79151695  | 76.39% | 0     |
| chr8  | <i>THAP1</i>   | 42691816  | 42693479  | 32.21% | 15.31 |
| chr20 | <i>TMEM230</i> | 5080483   | 5081577   | 38.00% | 8.21  |
| chr20 | <i>TMEM230</i> | 5080495   | 5081577   | 39.00% | 8.3   |
| chr20 | <i>TMEM230</i> | 5086833   | 5086956   | 48.00% | 18.93 |
| chr20 | <i>TMEM230</i> | 5092145   | 5092251   | 57.00% | 0     |
| chr20 | <i>TMEM230</i> | 5092409   | 5092454   | 39.00% | 0.13  |
| chr15 | <i>TTBK2</i>   | 43030927  | 43038455  | 38.36% | 15.34 |
| chr15 | <i>TTBK2</i>   | 43212635  | 43212976  | 74.85% | 0.48  |
| chr8  | <i>TTPA</i>    | 63972047  | 63973984  | 33.64% | 10.39 |
| chr8  | <i>TTPA</i>    | 63998376  | 63998612  | 76.37% | 13.87 |
| chr9  | <i>VCP</i>     | 35071753  | 35072305  | 75.41% | 2.85  |
| chr9  | <i>VPS13A</i>  | 79820893  | 79820995  | 32.04% | 12.09 |
| chr9  | <i>VPS13A</i>  | 79997194  | 79997921  | 32.97% | 3.7   |
| chr9  | <i>VPS13A</i>  | 79999500  | 80000106  | 26.52% | 4.01  |
| chr9  | <i>VPS13A</i>  | 80030871  | 80032399  | 33.09% | 7.49  |
| chr9  | <i>VPS13A</i>  | 80030871  | 80036453  | 35.00% | 2.13  |
| chr15 | <i>VPS13C</i>  | 62144589  | 62146757  | 33.66% | 12.31 |
| chr15 | <i>VPS13C</i>  | 62156504  | 62160146  | 29.04% | 1.34  |
| chr15 | <i>VPS13C</i>  | 62315609  | 62315719  | 27.93% | 2.3   |
| chr16 | <i>VPS35</i>   | 46691890  | 46694563  | 39.27% | 10.82 |
| chr16 | <i>VPS35</i>   | 46710494  | 46710604  | 38.74% | 11.79 |
| chrX  | <i>WDR45</i>   | 48937409  | 48937546  | 72.46% | 0.26  |
| chrX  | <i>WDR45</i>   | 48957987  | 48958059  | 69.86% | 0.67  |
| chr1  | <i>XPR1</i>    | 180805657 | 180808004 | 33.48% | 13.84 |
| chr1  | <i>XPR1</i>    | 180853141 | 180859415 | 36.88% | 4.18  |
